1           **Malaria transmission relies on concavin-mediated maintenance of**  
2                           ***Plasmodium* sporozoite cell shape**

3  
4 Jessica Kehrer<sup>1,2</sup>, Pauline Formaglio<sup>3</sup>, Julianne Mendi Muthinja<sup>1</sup>, Sebastian Weber<sup>4</sup>, Danny  
5 Baltissen<sup>1</sup>, Christopher Lance<sup>1</sup>, Johanna Ripp<sup>1</sup>, Janessa Grech<sup>5</sup>, Markus Meissner<sup>5</sup>, Charlotta  
6 Funaya<sup>4</sup>, Rogerio Amino<sup>3</sup> and Friedrich Frischknecht<sup>1,6#</sup>

7  
8 <sup>1</sup>Integrative Parasitology, Center for Infectious Diseases, Heidelberg University Medical  
9 School, Im Neuenheimer Feld 344, 69120 Heidelberg, Germany

10 <sup>2</sup>Infectious Diseases Imaging Platform, Center for Infectious Diseases, Heidelberg University  
11 Medical School, Im Neuenheimer Feld 344, 69120 Heidelberg, Germany

12 <sup>3</sup>Malaria Infection and Immunity Unit, Department of Parasites and Insect Vectors, Institut  
13 Pasteur, 25-28 Rue du Dr Roux, 75015 Paris, France

14 <sup>4</sup>Electron Microscopy Core Facility, Heidelberg University, Im Neuenheimer Feld 345, 69120  
15 Heidelberg, Germany

16 <sup>5</sup>Experimental Parasitology, Ludwig Maximilian University Munich, Lena-Christ-Strasse 48,  
17 82152 Planegg-Martinsried, Germany

18 <sup>6</sup>German Center for Infection Research (DZIF), partner site Heidelberg, Heidelberg, Germany

19  
20 # to whom correspondence should be addressed:

21 [freddy.frischknecht@med.uni-heidelberg.de](mailto:freddy.frischknecht@med.uni-heidelberg.de)

22 phone: +49-6221-566537      fax: +49-6221-564643

23  
24  
25  
26  
27  
28  
29  
30 Highlights:

- 31       - A membrane associated protein is essential for *Plasmodium* shape maintenance  
32       - Migrating parasites disintegrate in the absence of concavin  
33       - First protein essential for cellular integrity of *Plasmodium* sporozoites  
34       - Thickened and deformed *Plasmodium* sporozoites fail to be transmitted by mosquitoes

## 35 **ABSTRACT**

36 During transmission of malaria-causing parasites from mosquitoes to mammals, *Plasmodium*  
37 sporozoites migrate rapidly in the skin to search for a blood vessel. The high migratory speed  
38 and narrow passages taken by the parasites suggest considerable strain on the sporozoites to  
39 maintain their shape. Here we report on a newly identified protein, concavin, that is important  
40 for maintenance of the sporozoite shape inside salivary glands of mosquitoes and during  
41 migration in the skin. Concavin-GFP localized at the cytoplasmic periphery of sporozoites and  
42 *concavin(-)* sporozoites progressively rounded up upon entry of salivary glands. These rounded  
43 *concavin(-)* sporozoites failed to pass through the narrow salivary ducts and were hence rarely  
44 ejected by mosquitoes. However, normally shaped *concavin(-)* sporozoites could be transmitted  
45 and migrated in the skin or skin like environments. Strikingly, motile *concavin(-)* sporozoites  
46 could disintegrate while migrating through narrow strictures in the skin leading to parasite arrest  
47 or death and decreased transmission efficiency. We suggest that concavin contributes to cell  
48 shape maintenance by riveting the plasma membrane to the subtending inner membrane  
49 complex.

50

51

## 52 **SIGNIFICANCE**

53 Malaria parasites are transmitted by *Anopheles* mosquitoes and rely on rapid migration for  
54 establishing an infection. We identified and characterized a protein, named concavin, essential  
55 for maintaining the shape of the sporozoite. Concavin is a membrane associated protein facing  
56 the cytoplasm suggesting that it contributes to riveting the plasma membrane to the subtending  
57 inner membrane complex. Sporozoites lacking concavin can round up in the salivary glands,  
58 are less well transmitted to mice and disintegrate while migrating in the skin. Hence, concavin  
59 is essential for parasite transmission and infectivity.

60

61

## 62 **INTRODUCTION**

63 Malaria is still prevalent in tropical countries where it infects over 200 million people every  
64 year killing over 400,000, mostly young African children (WHO, 2020). While the symptoms  
65 of the disease are caused by the parasite stages infecting red blood cells, the only licenced  
66 malaria vaccine has been derived from the surface circumsporozoite protein (CSP) of the  
67 mosquito-transmitted parasite stage, the *Plasmodium* sporozoite (Clemens & Moorthy, 2016;  
68 Cowman et al., 2016). CSP is essential for sporozoite formation and functions at different steps

69 of the sporozoite journey from the mosquito gut to the mammalian liver (Aliprandini et al.,  
70 2018; Coppi et al., 2011; Ménard et al., 1997; Singer & Frischknecht, 2021; Thathy et al., 2002).  
71 Unfortunately, the CSP-based vaccine has failed to deliver the long-sought efficient protection  
72 from malaria infections and new vaccine candidates are urgently needed for exploration  
73 (Matuschewski, 2017). Secreted and/or plasma membrane associated sporozoite proteins might  
74 constitute additional good candidates for next generation vaccines.

75 *Plasmodium* sporozoites are deposited into the dermis during a mosquito bite and  
76 migrate at high speed to enter both blood or lymph vessels (Amino et al., 2006; Hopp et al.,  
77 2021). Those entering the blood can ultimately exit the circulation in the liver and infect  
78 hepatocytes to further develop into red blood cell infecting merozoites (Prudêncio et al., 2006;  
79 Tavares et al., 2013). Sporozoites are highly polarized and slender cells with a chiral sub-  
80 pellicular cytoskeleton that defines parasite length and curvature linked to the inner membrane  
81 complex (IMC) that subtends the plasma membrane (Gould et al., 2008; Harding &  
82 Frischknecht, 2020; Khater et al., 2004; Kudryashev et al., 2012; Spreng et al., 2019; Tremp et  
83 al., 2013; Volkmann et al., 2012). The IMC is found at a constant distance to and hence likely  
84 linked to the plasma membrane as shown for *Toxoplasma gondii* (Fréchal et al., 2010).  
85 Disruption of some IMC-proteins leads to parasite swelling around the nucleus, which impacts  
86 motility and infectivity (Khater et al., 2004; Volkmann et al., 2012). However, many proteins  
87 of the pellicle remain to be described and no detailed picture is yet available about how these  
88 complex interactions form and maintain the cellular shape (Harding & Frischknecht, 2020).

89 Sporozoites secrete proteins from micronemal vesicles and rhoptries at their apical pole  
90 (Dubremetz et al., 1998). Like CSP, these proteins can be essential for the escape of sporozoites  
91 from oocysts at the *Anopheles* midgut wall into the mosquito hemolymph, to enter salivary  
92 glands, for migration within the skin, to enter blood vessels and ultimately hepatocytes (Carey  
93 et al., 2014; Ishino et al., 2019; Klug & Frischknecht, 2017; Risco-Castillo et al., 2015; Silvie  
94 et al., 2004; Wang et al., 2005). Sporozoite migration within the skin provides the first possible  
95 target for intervention against an infection with *Plasmodium* (Aliprandini et al., 2018; Douglas  
96 et al., 2018; Murugan et al., 2020). Antibodies targeting CSP can inhibit sporozoite motility  
97 (Aliprandini et al., 2018; Vanderberg & Frevert, 2004) and induce self-killing of sporozoites  
98 via secreted pore-forming proteins, which are essential for sporozoite migration through cells  
99 (Aliprandini et al., 2018; Amino et al., 2008; Bhanot et al., 2003; Risco-Castillo et al., 2015).  
100 Other secreted proteins include TRP1, LIMP and CelTOS as well as members of the  
101 transmembrane TRAP (thrombospondin related anonymous protein) family. TRP1  
102 (thrombospondin related protein 1) is essential for the release of sporozoites from oocysts and

103 invasion of salivary glands (Klug & Frischknecht, 2017). LIMP and TRAP are essential for  
104 sporozoite invasion of salivary glands and liver cells (Santos et al., 2017; Sultan et al., 1997)  
105 and CelTOS (cell traversal protein for ookinetes and sporozoites) is important for sporozoite  
106 motility and migration through cells (Jimah et al., 2016; Kariu et al., 2006; Steel et al., 2018).  
107 CelTOS and TRAP are investigated as possible vaccine candidates (Pirahmadi et al., 2019;  
108 Tiono et al., 2018).

109 Proteomic analysis of sporozoites revealed a number of yet uncharacterized proteins  
110 including proteins on the parasite surface (Lindner et al., 2019; Lindner, Swearingen, et al.,  
111 2013; Swearingen et al., 2016). However, identification of surface proteins has been a challenge  
112 due to contamination from cytoplasmic proteins. We previously collected the supernatant from  
113 sporozoites activated by the addition of pluronic acid, which stimulates secretion (Kehrer,  
114 Singer, et al., 2016) and determined the proteins by mass spectrometry. From this set of  
115 putatively secreted proteins we selected the uncharacterized PbANKA\_1422900 protein for  
116 further analysis by gene deletion and GFP-tagging and found that this protein is localized at the  
117 cytosolic side of the plasma membrane. PbANKA\_1422900 is important for the maintenance  
118 of the sporozoite shape during their salivary gland residency and essential for efficient  
119 transmission to the vertebrate host. While deformed sporozoites could still move, they were not  
120 ejected through the narrow salivary ducts and failed to penetrate through skin and skin-like  
121 environments showing the importance of the slender shape for parasite transmission. Due to its  
122 impact on the convex-concave polarity of sporozoites we named the protein concavin.  
123 Strikingly, during sporozoite migration through strictures in the skin, we observed *concavin(-)*  
124 parasites to disintegrate by the apparent shedding of large membrane-delimited parts of the  
125 parasite.

126

127

## 128 **RESULTS**

### 129 **Concavin is a conserved Apicomplexan protein important for sporozoite shape** 130 **maintenance**

131 PBANKA\_1422900 is expressed highest in ookinetes and sporozoites according to RNA seq  
132 data obtained from Plasmodb.org (Figure S1). It is a 393 amino acid long protein in *P. berghei*  
133 and conserved among Apicomplexa. Concavin shares 96% amino acid residue identity with *P.*  
134 *yoelii*, 80% identity with *P. vivax*, 76% with *P. falciparum*, and 36% identity with the  
135 orthologue from *T. gondii* (Figure S1-S2). The only recognizable feature in this protein was a  
136 potential palmitoylation site at the N-terminus (Figure S2A). To test for a function of concavin,

137 we disrupted the gene through double homologous recombination in *P. berghei* (Figure S3) and  
138 *T. gondii* (Figure S4). Deletion of concavin readily yielded clonal *P. berghei* parasite lines,  
139 which grew at similar multiplication rates per 24h as wild type parasites in the blood stage  
140 (Figure 1A). Similarly, we could not detect a phenotypic difference in a plaque assay between  
141 wild type and transgenic *T. gondii* (Figure S4). Transmission of the *P. berghei concavin(-)*  
142 parasites to mosquitoes showed slightly reduced numbers of oocysts in infected mosquitoes  
143 (Figure 1B). We regularly found large numbers of *concavin(-)* sporozoites within the salivary  
144 glands, however, a large proportion of sporozoites showed an abnormal shape. While wild type  
145 sporozoites usually keep the typical curved and slender shape at any time post salivary gland  
146 entry, *concavin(-)* sporozoites rounded up over time. Rounding up of *concavin(-)* sporozoites  
147 was initiated at the posterior end of the cell (Figure 1C) and hence appeared different to the  
148 rounding observed after liver cell entry (Jayabalasingham et al., 2010) (see also Figure 2E).  
149 This loss of curvature led us to name PbANKA\_1422900 concavin. Curiously, over 90% of  
150 oocyst-derived *concavin(-)* sporozoites were normally formed. Yet with prolonged residency  
151 in salivary glands more sporozoites became deformed or rounded up completely (Figure 1D-  
152 E). In contrast, we never observed deformed wild type sporozoites, neither in the midgut nor in  
153 the salivary gland. Curiously, both deformed and normally shaped sporozoites were still able  
154 to move (Figure 1F-G). While normally shaped *concavin(-)* sporozoites displayed circular  
155 movement in a wild type manner with nearly wild type speed, deformed sporozoites progressed  
156 with significantly slower speed. (Figure 1F). Deformed sporozoites also moved on less curved  
157 paths as did wild type or normally formed *concavin(-)* parasites (Figure 1G).

158

### 159 **Concavin localizes at the cytosolic side of the periphery**

160 To localize concavin, we generated two parasite lines expressing a GFP-tagged version of the  
161 protein. To this end, we first reintroduced the *P. berghei concavin-gfp* sequence into the  
162 knockout, thus complementing the *concavin(-)* parasite line. In addition, we also complemented  
163 the *concavin(-)* with the *P. falciparum concavin-gfp* gene (Figure S5) and we tagged the  
164 ortholog from *Toxoplasma gondii* in that parasite (Figure S4). Both *Plasmodium* lines were able  
165 to establish mosquito infections comparable to wild type levels including the colonization of  
166 salivary glands by highly motile sporozoites suggesting that both proteins are fully functional  
167 (Figure 2A-C). Concavin-GFP could be detected in gametocytes, ookinetes, sporozoites and  
168 liver stages and was absent in blood stage parasites (Figure 2D-E, supplementary movie 1). In  
169 gametocytes the protein localized diffusely while in ookinetes and salivary gland derived  
170 sporozoites concavin-GFP localized at the periphery suggesting an association with the plasma

171 membrane. In *T. gondii* tachyzoites, we also found a peripheral signal (Figure S4). A peripheral  
172 localization could also derive from a protein resident in the sub-pellicular network, IMC or  
173 supra-alveolar space, the narrow space between IMC and the plasma membrane (Bane et al.,  
174 2016; Khater et al., 2004). To specify concavin-GFP localization we next fixed concavin-GFP  
175 expressing sporozoites and labelled them with anti-GFP antibodies with or without membrane  
176 permeabilization. Antibodies only detected concavin-GFP after permeabilization suggesting an  
177 internal localization of the protein (Figure 2F).

178

### 179 **Concavin-GFP is highly mobile and does not localize to the cytoskeleton**

180 To test if concavin-GFP is associated with a cytoskeletal structure we employed fluorescence  
181 bleaching and monitored the recovery of the signal (FRAP). As a control we generated a  
182 PHIL1-GFP line (Figure S6) as PHIL1 is a constituent of the subpellicular network. This line  
183 recapitulated the published localization of the protein at the periphery of merozoites, ookinetes  
184 and sporozoites (Figure S6, (Saini et al., 2017)). Concavin-GFP expressing sporozoites showed  
185 a rapid recovery of the fluorescence signal after a bleached spot was introduced by a high energy  
186 laser suggesting high lateral diffusion of concavin-GFP (Figure 3A, supplementary movie 2).  
187 In contrast, in bleached PHIL1-GFP sporozoites there was no detectable recovery as expected  
188 from a protein anchored in the sub-pellicular network (Figure 3B, supplementary movie 2).  
189 These data suggest that concavin-GFP is not associated to the subpellicular network or another  
190 stable cytoskeletal structure.

191 Next, we performed super-resolution (STED) co-localization experiments with  
192 antibodies against concavin-GFP, CSP and PHIL1-GFP. STED imaging showed that the signals  
193 of anti-GFP antibodies detecting PHIL1-GFP and antibodies against CSP were spatially  
194 separated (Figure 3C). In contrast, anti-GFP antibodies detecting concavin-GFP co-localized  
195 with anti-CSP antibodies. Similarly, antibodies recognizing CSP but stained with two different  
196 colours also co-localized (Figure 3C, Figure S7). This suggests that concavin-GFP is localized  
197 closer to the plasma membrane than PHIL1, probably within the alveolar space between IMC  
198 and plasma membrane or at the inner leaflet of the plasma membrane.

199 We next generated a non-clonal parasite line via single homologous recombination that  
200 expresses PHIL1-GFP in the *concavin(-)* parasite to investigate the subpellicular network in  
201 these parasites (Figure S6). PHIL1-GFP localization of this parasite was similar to that of  
202 PHIL1-GFP in wild type parasites in blood stages (Figure S6). However, in sporozoites, PHIL1-  
203 GFP appeared in an aberrantly localized manner, as would be expected from the changed shape  
204 of the sporozoite (Figure 3D, Figure S8). We compared this staining to *concavin(-)* parasites



205 where the microtubules were labelled with SiR tubulin or with anti-CSP antibodies. This  
206 showed that microtubules appeared largely intact (Figure 3E, Figure S8) and that CSP was  
207 found on the surface of the deformed sporozoites (Figure 3F, Figure S8). Curiously, however,  
208 close inspection of the PHIL1-GFP labelling showed unexpected accumulations of signal. To  
209 investigate the deformed sporozoites at higher resolution, sporozoite containing salivary glands  
210 were examined by transmission and scanning electron microscopy. This showed the IMC  
211 subtending the plasma membrane in both wild type (Figure 4A) and *concavin(-)* sporozoites  
212 (Figure 4B-C). In rounded *concavin(-)* sporozoites, the IMC was in addition partially not  
213 associated with the plasma membrane anymore, but extended deep into the sporozoite  
214 cytoplasm (Figure 4B-C), Figure S9). Using array tomography we next reconstructed serial  
215 sections of a complete rounded *concavin(-)* sporozoite. This clearly revealed an intact tube-like  
216 ‘rolled up’ structure separated by the IMC from the remaining plasma membrane (Figure 4C).  
217 This suggests that the IMC is still intact but detached from the subtending plasma membrane.

218

### 219 **Complementation with a palmitoylation site mutant partially restores sporozoite form**

220 We next complemented *concavin(-)* parasites with a *concavin* version that expresses an alanine  
221 instead of the cysteine of the likely palmitoylation site fused to GFP (Figure 5A, Figure S5). In  
222 blood stage parasites *concavin*<sup>C7A</sup>-GFP displayed a cytoplasmic signal in gametocytes but was  
223 absent in asexual stages identical to what we observed in wild type *concavin*-GFP parasites  
224 (Figure 5B). This *concavin*<sup>C7A</sup>-GFP parasite readily yielded sporozoites in oocysts (Figure 5C).  
225 and salivary glands. Quantitation of sporozoite shape from both locations showed that at any  
226 time point assessed, over 80% of sporozoites showed a normal shape, even as late as 22 days  
227 after infection, when the vast majority of *concavin(-)* sporozoites showed aberrant shapes  
228 (Figure 5D, compare to Figure 1D). Only very few sporozoites were completely rounded, while  
229 5- 20% of sporozoites showed a rounded proximal end or rounded off around the nucleus.  
230 Similar to *concavin(-)*, normal shaped *Concavin*<sup>C7A</sup>-GFP sporozoites were able to move in a  
231 wild type manner while deformed sporozoites were only able to move at reduced speed (Figure  
232 5E). This suggests that palmitoylation alone is not essential for *concavin* function. Furthermore,  
233 *Concavin*<sup>C7A</sup>-GFP showed a peripheral localization in both normally shaped and also slightly  
234 rounded sporozoites suggesting that localization was also not impaired by the mutation (Figure  
235 5F). The GFP signal in this line appeared similar to the signal obtained by anti-CSP antibodies  
236 in *concavin(-)* sporozoites. This suggests that *concavin*<sup>C7A</sup>-GFP localizes to the plasma  
237 membrane and not the IMC.

238

## 239 **Concavin is essential for efficient transmission**

240 To test if the rounded parasites could still transmit to mice, we let ten infected mosquitoes bite  
241 C57BL/6 mice, which are highly sensitive to *P. berghei* infections. All three mice that were  
242 bitten by mosquitoes infected with wild type parasites showed the typical blood stage infection  
243 in these experiments starting three days after the bites (Figure 6A,B). In contrast, only 8 of 12  
244 mice that were bitten by *concavin(-)* infected mosquitoes ever became infected. In these 8 mice  
245 the development of the blood stage infection was delayed by over one day compared to the wild  
246 type controls, in itself a loss of infectivity by 90% (Figure 6A,B). To test if deformed  
247 sporozoites could enter into cells, we performed an infection experiment, where sporozoites  
248 were added to cultured HeLa cells, which are as susceptible to *P. berghei* infection as  
249 hepatocytes (Kaiser et al., 2016). After incubation of 1h hour, cells were fixed and labelled with  
250 anti-CSP antibodies, without permeabilization, to distinguish sporozoites within and outside of  
251 cells. While the first three independent experiments showed a higher percentage of cell invasion  
252 for wild type than *concavin(-)* parasites, a fourth experiment lowered the level of statistical  
253 confidence (Supplementary Data Table S2). Importantly, however, the deformed parasites  
254 could enter into host cells, albeit *concavin(-)* parasites probably entered at an overall lower rate  
255 as wild type parasites (Figure 6C). Liver-stage development of *concavin(-)* parasites did not  
256 show any difference to wildtype parasites (Figure 6D).

257 But could deformed *concavin(-)* parasites at all reach the liver *in vivo*? Two obstacles  
258 might block the progression of the deformed or rounded parasites from the salivary gland to the  
259 liver: the narrow salivary ducts through which the parasites are ejected and the dermis in the  
260 skin, through which the parasites need to pass prior to entering the blood stream. To test  
261 transmission efficiency, we first immobilized *concavin(-)* infected mosquitoes on glass slides  
262 and observed the ejection of sporozoites (Figure 7E). As expected (Aleshnick et al., 2020;  
263 Frischknecht et al., 2004), ejection of sporozoites was highly irregular (Figure 6E). Yet, at days  
264 17 and 21 in four different experimental sessions we always observed at least one mosquito  
265 salivating many dozens of sporozoites while most ejected just a few or none. While not all  
266 ejected sporozoites could be readily classified according to their shape the vast majority of  
267 sporozoites showed a normal crescent shaped (Movie S3). Some appeared rounded but often  
268 revealed themselves as being normally shaped once they reoriented in the focal plane after  
269 ejection into the droplet of saliva (Movie S3). We could not confidently see ejected sporozoites  
270 that were rounded suggesting that these cannot enter the salivary canal, albeit we cannot exclude  
271 that about 10-20% of ejected sporozoites were deformed. Yet, when investigating the  
272 sporozoites resident in the salivary gland of the mosquitoes that ejected many sporozoites over



273 80% of *concavin(-)* sporozoites were deformed. This suggested that rounded sporozoites could  
274 not efficiently enter into and pass through the salivary canals. To test if sporozoites fail to  
275 migrate through confined spaces, we squeezed a salivary gland between a glass slide and a  
276 polyacrylamide gel such that sporozoites were liberated and able to enter into the gel (Figure  
277 6F) (Ripp et al., 2021). On the surface of the gel both deformed and normally shaped parasites  
278 are readily visible, while at the bottom end of the gel, only normally shaped sporozoites were  
279 found (Figure 6F-G), indicating that deformed sporozoites could not cross the dense matrix of  
280 the gel. These data suggest that deformed sporozoites cannot enter and move through confined  
281 spaces such as salivary canal and probably also not in skin.

282

### 283 **Disintegration of sporozoites migrating in the skin**

284 To investigate if *concavin(-)* sporozoites could progress through the skin, we let mosquitoes  
285 infected with wild type or *concavin(-)* sporozoites expressing a cytosolic fluorescent protein  
286 bite the ear pinnae of mice and imaged with a spinning disk confocal microscope. This showed  
287 that mosquitoes were less successful in transmitting *concavin(-)* than wild type sporozoites.  
288 Fewer mosquitoes transmitted *concavin(-)* sporozoites and at lower numbers (Figure 7A),  
289 although the lower level of fluorescence in the *concavin(-)* sporozoites might have impeded  
290 precise quantification. Intriguingly, of 90 *concavin(-)* sporozoites observed over 13 different  
291 bite sites, 72 (80%) appeared to have a normal morphology, suggesting that indeed fewer  
292 abnormal sporozoites pass through the mosquito proboscis during a bite (Figure S10A/ B). The  
293 remaining 18 (20%) *concavin(-)* sporozoites were abnormally shaped from the beginning of the  
294 recording, some being only half as long as normal sporozoites, appearing completely roundish  
295 or exhibiting a rounded posterior end (Figure S10A/ B). Analysis of time-lapse series showed  
296 fewer migrating mutant sporozoites, which however progressed with the same speed as wild  
297 type parasites (Figure 7B; Movie S4). In addition, fewer blood vessel invasion events were  
298 observed in motile micro-syringe inoculated *concavin(-)* sporozoites (Figure 7C). Strikingly,  
299 some sporozoites formed a bulky dot at their rear (deformation) during migration, mostly  
300 associated with passing through a narrow stricture as indicated by their body constriction and  
301 decrease in speed (Figure 7D; Movie S5). This round posterior structure sometimes detached  
302 as the parasites kept moving forward and this loss of body integrity was defined as  
303 disintegration (Figure 7E; Movie S5). Of 54 wild type sporozoites only 2 (4%) showed  
304 disintegration, while 32% of 57 migrating *concavin(-)* sporozoites disintegrated and 7%  
305 exhibited posterior deformation only (Figure 7F). This suggests that in their effort to migrate  
306 in the skin, around 30-40% of *concavin(-)* sporozoites lose their shape or cellular integrity.

307 Most of those sporozoites stop migrating while some appear to suffer no impairment for the  
308 duration of imaging, and around 10% loses viability as evidenced by the loss of GFP  
309 fluorescence (Figure 7G). Disintegration most frequently occurred when sporozoites were  
310 gliding inside hair follicles, in the upper part of the dermis or after sustained circular gliding,  
311 which is usually associated with cell traversal (Formaglio et al., 2014). This suggests that  
312 sporozoite disintegration is a consequence of tight interactions between migrating parasites and  
313 host cells either because the sporozoites squeeze themselves between or through cells.

314 Together these data strongly suggest that *concavin(-)* sporozoites fail to maintain their  
315 shape, which blocks migration into the salivary ducts and leads to lower levels of transmission.  
316 Of the transmitted sporozoites, a large proportion loses their cellular integrity and cannot  
317 migrate efficiently in the skin explaining the reduced transmission to the mammalian host.

318

319

## 320 **DISCUSSION**

321 Here we show that a new protein named concavin contributes to cell shape maintenance  
322 in *Plasmodium berghei* sporozoites and is essential for efficient transmission of malaria  
323 parasites from mosquitoes to the mammalian host. Although expressed before sporozoites enter  
324 salivary glands, the function of concavin only becomes apparent upon prolonged residency  
325 within this organ. The parasites appear to rely on concavin to keep the IMC closely subtending  
326 the plasma membrane as loss of the protein leads to blebbing of plasma membrane and  
327 invaginations of the IMC. The rounding of the sporozoite inhibits ejection from the narrow  
328 salivary canals and leads to less efficient deposition of parasites in the skin. Transmitted  
329 *concavin(-)* parasites are not yet rounded and can move in the skin as wild type parasites do,  
330 but upon squeezing through narrow spaces they lose their cellular integrity much more  
331 frequently than wild type parasites. It appears that restraining forces from the environment act  
332 upon the motile parasites, which necessitated the evolution of a machinery that keeps the  
333 parasites from disintegration. Likely the skin provides a formidable challenge for the parasite  
334 as they move for tens of minutes past collagen fibres as well as through and between cells.  
335 Based on the number of newly transcribed genes upon salivary gland entry (Matuschewski et  
336 al., 2002), the parasite clearly prepares actively for its journey through the skin to the liver.  
337 Hence it might be possible that other proteins also contribute to one or multiple complexes that  
338 involve concavin and gliding associated proteins for riveting the plasma membrane and IMC.

339 A strikingly similar loss of cellular integrity during migration of sporozoites is observed  
340 in the presence of antibodies targeting CSP (Aliprandini et al., 2018). This surprising similarity

341 shows that the skin is a harmful environment for the moving sporozoite, and indicates that the  
342 lack of concavin and the crosslinking of CSP by antibodies can fragilize the parasite. Could  
343 these processes be linked? Antibodies crosslink CSP into large aggregates, which are shed at  
344 the rear of the parasite and can literally strip a migrating sporozoite. The force acting upon the  
345 parasite by these large aggregates being stuck within the tissue as the parasite pushes forward  
346 might well lead to a rupture of the plasma membrane-IMC link and hence blebbing. Detailed  
347 electron microscopy images of disintegrating parasites would be needed to address if the  
348 processes are similar. We postulate that concavin is anchored in the plasma membrane by  
349 palmitoylation at its N-terminus, possibly by the palmitoyl-S-acyl transferase DHHC2, which  
350 is located at the sporozoite periphery with a bias towards the rear end (Santos et al., 2015). It  
351 might hence interact within the membrane with the GPI-anchor of CSP, which could influence  
352 the mobility within the membrane of both proteins.

353 Interestingly, disrupting a predicted palmitoylation site in concavin led to only a very  
354 mild phenotypic difference from the wild type with less than 20% of the salivary gland derived  
355 concavin<sup>C7A</sup>-GFP parasites showing an aberrant shape. This would suggest that palmitoylation  
356 only partially contributes to concavin function and could hint towards the presence of other  
357 protein-protein interaction that are essential for concavin functionality and sporozoite shape  
358 maintenance. This finding of partial impact of palmitoylation is reminiscent of the recent work  
359 on palmitoylation of the myosin light chain in *Toxoplasma gondii* (Rompikuntal et al., 2020),  
360 where disruption of palmitoylation led to the partial disassembly of the gliding motor complex  
361 but had little impact on motility itself. Considering the EM images showing large invaginations  
362 of the IMC away from the plasma membrane in *concavin(-)* sporozoites, we postulate that  
363 concavin might contribute towards riveting the plasma membrane to the subtending IMC,  
364 which are a constant distance of 25 nm apart. In *T. gondii* the gliding associated protein 45  
365 (GAP45) was shown to bridge the gap between IMC and plasma membrane (Frénel et al., 2010)  
366 and fulfil a similar function. GAP45 is associated with the PM through N-terminal  
367 palmitoylation and myristoylation and interacts with the IMC at the C- terminus. Intriguingly,  
368 *gap45(-)* *T. gondii* parasites develop normally but show aberrant IMC invaginations upon host  
369 cell invasion, reminiscent of the deformed *concavin(-)* *Plasmodium* sporozoites (Egarter et al.,  
370 2014; Frénel et al., 2010). Strikingly, concavin is the first protein essential for sporozoite shape  
371 maintenance that is not fixed to or appears as part of a cytoskeletal structure. Compared to  
372 *Plasmodium berghei* GAP45 which consists of 184 aa, concavin is about twice as large (393  
373 aa) and hence might well span the distance between plasma membrane and IMC. How the  
374 protein contributes to keeping the IMC in place remains elusive. Understanding how it remains

375 mobile while contributing to cellular shape maintenance clearly needs further work. The  
376 presence of a potential palmitoylation site at the C- terminus of concavin, in combination with  
377 the ability of the protein to recover after FRAP suggest an incorporation into the PM rather than  
378 the IMC. The ability of normal and deformed sporozoites to remain motile excludes most likely  
379 a function of concavin in glideosome formation. We speculate that concavin is either directly  
380 involved in PM and IMC organisation or through transient interactions with GAP45. Open  
381 questions include: does concavin interact with other proteins and if yes, what are the binding  
382 partners? Does it interact with proteins linked to the IMC or the actin-myosin motor machinery  
383 that drives the parasite? Likely more proteins are important in keeping the plasma membrane  
384 at a constant distance from the IMC and maintaining the shape of these parasites.

385 Sporozoites are not born with a final shape, but mature from long and slender ones in  
386 the oocysts to crescent-shaped slightly thicker ones in the salivary glands (Kudryashev et al.,  
387 2012; Muthinja et al., 2017). Investigations by cryogenic electron tomography revealed that the  
388 sub-pellicular network (SPN) is only robustly detectable in sporozoites isolated from the  
389 salivary glands (Kudryashev et al., 2012) and tagging of SPN proteins revealed their peripheral  
390 localization only in salivary gland derived sporozoites (Khater et al., 2004). This suggests that  
391 the SPN and possibly its linkage to microtubules plays a key role in generation of the crescent  
392 shape observed for transmission ready sporozoites. In turn, this suggests that the shape has a  
393 key function for sporozoite infectivity. Indeed, mutants where the shape of sporozoites is altered  
394 have been shown to transmit less efficiently or not at all to rodent hosts (Montagna et al., 2012;  
395 Spreng et al., 2019; Tremp et al., 2013; Volkmann et al., 2012). Yet, *concavin(-)* sporozoites  
396 reveal for the first time a loss of cellular integrity as a phenotypic consequence of deleting a  
397 *Plasmodium* gene. The movies of sporozoites migrating in the mouse skin *in vivo* suggest that  
398 plasma membrane containing considerable amounts of cytosol is lost as the parasites migrate  
399 through tight strictures.

400 Upon liver cell invasion, the sporozoite naturally changes its shape, a likely active  
401 process depending on newly translated proteins from stored transcripts (Gomes-Santos et al.,  
402 2011). Deletion of the RNA binding protein pumilio-2 led to a progressive rounding of  
403 sporozoite already in the salivary glands and premature expression of liver stage specific genes  
404 (Gomes-Santos et al., 2011; Lindner, Mikolajczak, et al., 2013). In contrast to pumilio-2  
405 mutants, which only round up after several days of salivary gland residence, the lack of  
406 concavin led to early rounding after salivary gland invasion (Figure 1C-E). This, and the  
407 different localization of the two proteins suggests a completely different function of the two  
408 proteins. Also, *pumilio-2(-)* sporozoites ‘round up’ in a way reminiscent of the shape changes

409 after liver cell invasion: the sporozoites bleb in the center with their ends initially keeping their  
410 sporozoite shape (Gomes-Santos et al., 2011). This is similar to the rounding of mutants lacking  
411 the IMC-1 and IMC-1h proteins (Khater et al., 2004; Volkmann et al., 2012). In contrast  
412 *concavin(-)* sporozoites round up from their proximal ends. (Figure 1B, 5C-E and Figure S8).

413 We found that in *T. gondii* disrupting the concavin orthologue has no visible impact on  
414 *in vitro* life in cultured fibroblasts. This however does not rule out that during other parts of the  
415 life cycle of this parasite more constraining barriers encountered by the parasite might impact  
416 on cellular integrity too. We observed a slight reduction in oocyst numbers, which hints at a  
417 possible function of concaving also for ookinetes. Ookinetes need to pass the peritrophic matrix  
418 that forms around the ingested blood meal and through one layer of epithelial cells. Ookinetes  
419 move much slower than sporozoites and hence concavin might not be as important during their  
420 short life as it is for the much longer living and faster migrating sporozoites facing many more  
421 constrictions on their journey from oocyst to liver.

422 In conclusion, we showed here the disintegration of migrating *Plasmodium* sporozoites  
423 due to the lack of a novel protein, concavin. Concavin was identified by a proteomics analyses  
424 of secretion. Functional analyses through GFP-tagging, FRAP, gene deletion and *in vivo*  
425 imaging showed the importance of concavin for the maintenance and integrity of *Plasmodium*  
426 sporozoite shape and hence efficient transmission from mosquito to mammal.

427

428

## 429 MATERIALS AND METHODS

### 430 Generation of parasite lines

431 *Concavin(-)*: The 3`UTR (779 bp) of PbANKA\_1422900 was amplified from wild type gDNA  
432 using primers JK57 and JK58 and inserted into a plasmid (pL22) containing the recyclable  
433 yFCU/ hDHFR selection cassette and *gfp* expressed under the *hsp70* promoter digested with  
434 NotI and SacII. The 5`UTR (554 bp) was amplified using primers JK55 and JK56 and inserted  
435 into the plasmid using KpnI and HindIII. The resulting plasmid pL24 was linearized with KpnI  
436 and SacII prior transfection for double crossover integration (Figure S3; Table S1).

437 *Marker free concavin(-) NS*: The drinking water of mice infected with *concavin(-)* parasites  
438 was supplemented with 2 mg/ml 5-FC (5-fluorocytosine). Clonal parasites which looped out  
439 the selection cassette were obtained by limiting dilution. (Figure S3; Table S1)

440 *P. berghei* complementation: The 5`UTR together with the entire ORF of PbANKA\_1422900  
441 was amplified from wild type gDNA using primers JK55 and JK176 and inserted into a plasmid  
442 (pL59) containing *gfp* and the *TgDHFR* selection cassette using KpnI and NdeI. Resulting in

443 plasmid pL79. For transfection of *concavin(-)NS* parasites via double crossover the plasmid  
444 was digested with KpnI and SacII. (Figure S5; Table S2)

445 PF3D7 complementation: The *P. berghei* 5' UTR was amplified using primers JK55 and JK179  
446 and inserted into pL59 using KpnI and BstBI. Followed by the insertion of PF3D7\_0814600  
447 amplified with primers JK177 and JK178 from *P. falciparum* gDNA and digested with BstBI  
448 and NdeI. For transfection of *concavin(-)NS* parasites via double crossover the plasmid was  
449 digested with KpnI and SacII. (Figure S5; Table S2)

450 Concavin<sup>C7A</sup> complementation: *Concavin<sup>C7A</sup>* together with *gfp* was amplified from pL79 using  
451 primers JK236 and JK237. The resulting PCR product was digested with BamHI and ligated  
452 into pL82 digested with BamHI and BstBI with filled in overhangs. Leading to the final plasmid  
453 pL120. For transfection of *concavin(-)NS* parasites via double crossover the plasmid was  
454 digested with KpnI and SacII. (Figure S5; Table S2)

455 PhIL1-GFP: PhIL1-GFP (PBANKA\_020460) parasites with GFP at the C-terminus were  
456 generated via single homologous recombination. A region of the PhIL1 gene 54 bp downstream  
457 of the ATG start codon and lacking the stop codon was amplified using primers P969 and P970  
458 (Figure S6; Table S2). The PCR product was digested using EcoRI and BamHI enzymes and  
459 ligated into a vector containing the *TgDHFR* selection cassette as a positive selection marker.  
460 For transfection the final vector was linearized using BsaBI.

461  
462 Transfection of linearized plasmids was performed as previously described (Janse et al., 2006).  
463 After electroporation of schizonts, positive selection was performed using pyrimethamine. All  
464 resulting monoclonal lines were obtained through limiting dilution using NMRI or CD1 mice.  
465 Briefly, 0,9 parasites were injected into 10 naïve mice followed by genotyping of positive  
466 animals on day 9 post infection.

467

## 468 **Mosquito infections**

469 All experiments were performed with *Anopheles stephensi* mosquitoes, fed with 1% salt/water  
470 and 10% sucrose/water solution containing 0.05% Para- aminobenzoic acid (PABA). Naïve  
471 mosquitoes were kept at 28°C and 70% humidity and subsequently transferred to 21°C after  
472 infection. Infection of mosquitoes was done with mice infected with 20 million blood stage  
473 parasites, 4 days post infection. Gametocyte formation was monitored by counting  
474 exflagellation events in peripheral blood. Mice were anesthetized with a combination of  
475 ketamin/ xylazin and mosquitoes were allowed to bite for 20 min.

476



## 477 **Sporozoite motility assay**

478 Gliding assays of isolated sporozoites were performed in 96-well optical bottom plates (Nunc)  
479 using 3% BSA/ RPMI with a frame rate of 3 seconds for 3 minutes on a Zeiss CellObserver  
480 widefield microscope with 25 x magnification. Speed was determined with the manual tracking  
481 tool in ImageJ.

482

## 483 **Immunofluorescence staining of sporozoites**

484 Sporozoites were seeded with 3% BSA/ RPMI into an 8well labtek chambered cover glass.  
485 After fixation with 4% PFA for 20 minutes, cells were permeabilized with 0.5% TritonX for 15  
486 minutes. Primary antibodies were incubated for 1 hour and washed twice with PBS. Secondary  
487 antibodies together with Hoechst were incubated for 1 hour. Cells were washed twice with PBS  
488 and observed under the microscope. Images were either taken on a Zeiss CellObserver  
489 widefield (63x) or Nikon/PerkinElmer spinning disc (100x) microscope. Image processing was  
490 performed with ImageJ. Antibodies: rabbit anti GFP for IFA 1/40 (abfinity 0,4 µg/ µl), mouse  
491 anti CSP (mAb 3D11, 1/100, Yoshida et al 1980), goat anti-mouse Alexa 594 1/1000  
492 (Invitrogen 2 mg/ml), goat anti-rabbit Alexa 594 1/1000 (Invitrogen 2 mg/ml). For STED  
493 imaging anti-mouse Atto 594 1/300 (Sigma) and anti-rabbit Atto 647N 1/300 (Sigma) was used.  
494 Staining of sporozoites with antibodies or Sir tubulin was performed as described previously  
495 (Spreng et al., 2019)

496

## 497 **FRAP**

498 FRAP experiments were performed using a PerkinElmer Nikon spinning disc microscope with  
499 FRAP module. Images were taken with a 100x objective (NA 1,4) every 0,5 seconds. Selected  
500 regions were bleached using a 405 nm laser at 100% laser power.

501

## 502 **STED imaging**

503 Super- resolution imaging was performed on a STED microscope from Abberior Instruments  
504 GmbH (Göttingen) using a 100x objective. STED- illumination was done using a 594 nm or  
505 640 nm excitation laser in combination with 775 nm depletion. Images were taken with 15 nm  
506 pixel size and line accumulation of 2. Deconvolution was done using the Inspector software  
507 provided by Abberior using the Richardson- Lucy algorithm with 30 iterations. Further image  
508 processing was done using Fiji.

509

510

## 511 **Electron Microscopy**

512 Isolated salivary glands from infected *Anopheles stephensi* mosquitoes were directly dissected  
513 into 2% glutaraldehyde and 2% paraformaldehyde in 100 mM Cacodylate buffer and fixed at  
514 4°C overnight. After rinsing in buffer the samples were further fixed in 1% osmium in 100 mM  
515 Cacodylate buffer for 1 hour, washed in water, and incubated in 1% uranylacetate in water  
516 overnight at 4°C. Dehydration was done in 10 minute steps in an acetone gradient followed by  
517 stepwise Spurr resin infiltration at room temperature and polymerization at 60°C.

518 The blocks were trimmed to get cross sections of the salivary glands and sectioned using a  
519 Leica UC6 ultramicrotome (Leica Microsystems Vienna) in 70 nm thin sections. The sections  
520 were placed on formvar coated slot grids, post-stained in uranyl acetate and Reynold's lead  
521 citrate and imaged on a JEOL JEM-1400 electron microscope (JEOL, Tokyo) operating at 80  
522 kV and equipped with a 4K TemCam F416 camera (Tietz Video and Image Processing Systems  
523 GmBH, Gautig).

524

## 525 **Array tomography**

526 3D reconstruction of the round sporozoites was done using array tomography. Ultrathin serial  
527 sections (70 nm) were cut on an UC7 ultramicrotome (Leica Microsystems, Vienna, Austria)  
528 equipped with a section receiver (cd-fh, Heidelberg) enabling a smooth pick up of serial  
529 sections on wafers (Si-Mat SiliconMaterials) treated by glow discharge. The sections were post-  
530 stained by placing the wafer pieces in uranyl acetate 20 min and lead citrate for 10 min, each in  
531 a closed tube. The wafers with sections were washed repeatedly in water after each step. Serial  
532 sections through one sporozoite (around 40 sections) were imaged by scanning electron  
533 microscopy with a LEO Gemini 1530 equipped with a field emission gun and an ATLAS  
534 scanning generator (Zeiss). Images of 10.000 x 10.000 pixels and 2nm resolution were  
535 taken at the same area in consecutive sections using the in-lens detector. Imaging parameters  
536 used: 3 mm working distance, 30 µm aperture and 2 kV acceleration voltage. The images  
537 through each parasite were aligned and the membranes segmented manually using the IMOD  
538 software package (Kremer et al, 1996). In total 6 sporozoites were reconstructed.

539

## 540 **Sporozoite invasion into cells and liver- stage development**

541 Hela cells were seeded into 8 well Labtek chamber slides with glass bottom. Once the cells  
542 reached about 95% confluency sporozoites were added on top of the cells. The entire slide was  
543 centrifuged for 5 minutes at 800 rpm to make the sporozoites adhere to the cells and incubated  
544 at 37°C. After 1 hour the cells were fixed with 4% PFA/ PBS for 30 minutes. Followed by

545 staining of the cells against CSP (mouse anti CSP mAb 3D11, 1/ 100, Yoshida et al 1980). The  
546 primary antibody was incubated for 1 hour and washed twice with PBS. The secondary antibody  
547 (goat anti-mouse Alexa 594 1/1000 (Invitrogen 2mg/ml)) together with Hoechst were incubated  
548 for 1 hour. Cells were washed twice with PBS and observed under the microscope. Images were  
549 either taken on a Zeiss CellObserver widefield (63x) or Nikon/PerkinElmer spinning disc  
550 (100x) microscope. Image processing was performed with Fiji.

551 For liver-stage development cells were split into 2 wells 1 hour post infection and fixed with  
552 4% PFA/ PBS after 24 h and 48 h. Nuclei were stained with Hoechst and images taken on a  
553 Zeiss Axio-Observer widefield (63x) microscope. Image processing and quantification of  
554 parasite size was done with Fiji.

555

### 556 **Live imaging of Mosquito sporozoite ejection**

557 For imaging of ejected sporozoites mosquitoes were immobilized with small drops of superglue  
558 on the wings and thorax on a 24x 60 mm cover glass. The labrum was carefully removed using  
559 2 needles to liberate the stylets of the mosquito which were ideally pressed flat onto the cover  
560 glass. Imaging was done on a Zeiss Axio- Observer with 25x Objective at a frame rate of 3  
561 frames per second.

562

### 563 **3D Imaging in polyacrylamide gels**

564 Polyacrylamide hydrogels were prepared as described before (Pelham & Wang, 1997). Briefly,  
565 APS and TEMED were added to a prepolymer solution containing 3% acrylamide and 0.03%  
566 bis-acrylamide in PBS. The solution was pipetted onto a silanized glass coverslip immediately  
567 and covered with a second glass coverslip. After polymerization, the top coverslip was removed  
568 in PBS. Whole salivary glands were dissected into 30  $\mu$ l 3% BSA/RPMI and covered with the  
569 hydrogel. Images were recorded on top of the hydrogel as well as at the hydrogel-glass interface  
570 using a 25x objective and a frame rate of 3s.

571

### 572 ***In vivo* imaging of sporozoites in the mouse skin**

573 *In vivo* imaging in the skin was performed on a spinning-disk confocal system (UltraView ERS,  
574 Perkin Elmer) controlled by Volocity (Perkin Elmer) and composed of 4 Diode Pumped Solid  
575 State Lasers (excitation wavelengths: 405 nm, 488 nm, 561 nm and 640 nm), a Yokogawa  
576 Confocal Scanner Unit CSU22, a Z-axis piezoelectric actuator and a Hamamatsu Orca-Flash  
577 4.0 camera mounted on a Axiovert 200 microscope (Zeiss). Z-stacks of 6 plans covering 25 to

578 30  $\mu\text{m}$  were acquired using a LCI “Plan- Neofluar” 25x/0.8 Imm Korr DIC objective (Zeiss) at  
579 a rate of 2.7 frames per second for up to 80 minutes following sporozoite transmission.

580 For bite transmission experiments, infected *Anopheles stephensi* were selected under an  
581 epifluorescence stereomicroscope 14-15 days after the infectious blood meal and used between  
582 day 18 to 21 post-infection. To enhance bite rate, mosquitoes were deprived of sucrose one day  
583 before the experiment. For intravital imaging of syringe-inoculated sporozoites, infected  
584 salivary glands were harvested in 1x DPBS 13 to 21 days following the infectious blood meal  
585 and kept intact on ice. Shortly before the experiment, they were crushed, filtered on a 35- $\mu\text{m}$   
586 strainer and further diluted in 1x DPBS. All experiments were performed using either concavin  
587 KO sporozoites or a control *P. berghei* ANKA strain expressing GFP under the control of the  
588 *hsp70* promoter (Ishino et al., 2006).

589 Prior to imaging, 4- to 6-week old female C57BL/6JRj mice (Janvier Labs) were  
590 injected intravenously into the tail vein with 10-15  $\mu\text{g}$  of Alexa Fluor™ 647-coupled anti-CD31  
591 antibody (clone 390, Biolegend) to label blood vessels. Animals were then anesthetized with a  
592 mixture of ketamine (125 mg/kg body weight, Imalgene 1000, Merial) and xylazine (12,5  
593 mg/kg body weight, Rompun 2%, Bayer), and their ear pinnae were gently epilated with a piece  
594 of tape. The dorsal side of their ears was then either exposed to mosquito bites for two minutes  
595 or injected with 0.2  $\mu\text{L}$  of sporozoite suspension using a micro syringe (NanoFil 10  $\mu\text{L}$  syringe  
596 mounted with a 35G beveled needle, World Precision Instruments), yielding fields of view  
597 containing in average 100 parasites. Animals were then immediately transferred onto the  
598 microscope stage to localize and image the inoculation sites. During acquisition, mice were  
599 kept warm with a heating blanket (Harvard Apparatus) and their anesthesia status was regularly  
600 monitored (Amino et al., 2007).

601 Image files were processed and quantified using Fiji (Schindelin et al., 2012). Parasite  
602 morphology in the skin was determined on the first images obtained immediately after  
603 localization of the bite site. Sporozoite movements were manually tracked over 2-min movies  
604 recorded at the indicated time points after inoculation and mean velocity was determined using  
605 the MTrackJ plug-in (Meijering et al., 2012). Sporozoites whose speed was inferior to 0.25  
606  $\mu\text{m}/\text{s}$  were considered immotile. Blood vessel invasion events were quantified over the first  
607 hour following sporozoite micro-injection and normalized to the number of motile sporozoites  
608 in the field at 10 min post-infection. To quantify the frequency of parasite disintegration after  
609 bite transmission, only sporozoites which could be tracked for at least 10 min were taken into  
610 consideration. Following loss of parasite integrity, gradual disappearance of fluorescence was  
611 considered a hallmark of sporozoite death.

612 ***T. gondii* parasite culture**

613 Parasites were cultured in Human Foreskin Fibroblasts (HFFs) using Dulbecco's modified  
614 Eagle's medium (DMEM) supplemented with 10% fetal calf serum, 2mM L-glutamine and  
615 10mg/mL gentamycin. Cell culture was maintained at 37°C and 5% CO<sub>2</sub>.

616

617 ***T. gondii* parasite strain generation**

618 *Parasites with TGGT1\_216650 endogenously tagged and floxed*

619 Endogenous tagging was done as described in (Stortz et al., 2019). Briefly, RH $\Delta$ ku80DiCre  
620 tachyzoites (created by Dr Moritz Treeck (Hunt et al., 2019) were used for endogenous tagging.  
621 Guide RNAs to target both the C-terminal region, and upstream of the predicted 5'UTR of  
622 TGGT1\_216650 were designed. These guides were cloned into a plasmid which expressed  
623 Cas9-YFP. The 5' loxP was introduced into the parasites as an oligo flanked by 33bp of  
624 sequences homologous to the region that the Cas9 targeted. The repair templates used for the  
625 introduction of the C-terminal tags (YFP and SNAP) were amplified by PCR (Q5 polymerase,  
626 New England Biolabs) from template plasmids. The primers used for the amplification of these  
627 tags were designed in such a way that an LIC sequence was used as a linker between the protein  
628 and the tags, whereas a loxP sequence was introduced downstream of the tags. Homology  
629 sequences 50bp long were added on either side of the tags to facilitate homologous  
630 recombination. The 5'loxP and 3' tags were introduced into the parasites in two separate  
631 successive transfections. 10 $\mu$ g of vector (encoding the guide RNA and Cas9-YFP) and the  
632 respective repair templates were transfected into 1x10<sup>7</sup> newly egressed parasites, using 4D  
633 AMAXA electroporation. Following transfection, the parasites were allowed to invade and  
634 replicate for approximately 40hrs, at which point they were mechanically egressed, filtered, and  
635 sorted for transient Cas9-YFP expression using a cell sorter (FACSAria IIIu, BD Biosciences)  
636 into 96-well plates. Successfully genetically modified parasite clones were identified by IFA,  
637 PCR and sequencing (using primers designed to bind as indicated by the blue and red arrows  
638 in Figure S4.

639

640 **Induction of TGGT1\_216650 knock-out**

641 RH $\Delta$ ku80DiCre tachyzoites with a floxed TGGT1\_216650 C-terminally tagged with a SNAP-  
642 tag were cultured in the presence of 50nM rapamycin for 1 week and then cloned out by serial  
643 dilution in a 96-well plate. Successful knockouts were identified by PCR and sequencing using  
644 primers designed to bind as indicated by the black arrows in Figure S4.

645

646 ***T. gondii* Plaque assay**

647  $5 \times 10^2$  parasites were used to inoculate 6-well plates in the presence of dimethyl sulfoxide  
648 (DMSO) as vehicle control or 50nM rapamycin. After 7 days of undisturbed incubation, the  
649 cells were fixed with 100% ice cold methanol for 20mins at room temperature, and washed  
650 with phosphate buffered saline. The cells were then left in eosin for 1min, followed by 2mins  
651 in methylene blue, and finally washed thoroughly with water.

652

653 ***T. gondii* Immunofluorescence assays and microscopy**

654 HFFs were inoculated with parasites for 24hrs, after which they were either imaged live or fixed  
655 with 4% paraformaldehyde (PFA) for 20mins at room temperature. For live imaging, the dyes  
656 (SNAP-Cell 647-SiR, and HALO-tag Oregon Green) were used as per the manufacturer's  
657 instructions. For fixed samples, the cells were washed 3 times with phosphate buffered saline  
658 (PBS) following fixation, and then permeabilized and blocked for 45mins at room temperature  
659 with 3% bovine serum albumin (BSA), 0.2% Triton X-100 in PBS. The cells were then labelled  
660 with the following primary antibodies for 1hr at room temperature; mouse anti-GFP (1:500,  
661 monoclonal Anti-GFP, Roche), rabbit anti-GFP (1:1000, polyclonal Anti-GFP, abcam), rabbit  
662 anti-GAP45 (1:1000, a generous gift from Dominique Soldati Favre; (Plattner et al., 2008)),  
663 mouse anti-IMC1 (1:2000, a generous gift from Gary Ward; (Tilley et al., 2014)). After  
664 incubating with primary antibodies, the cells were washed 3 times with PBS and then labelled  
665 with the following secondary antibodies for 1hr at room temperature in the dark; STAR 635P  
666 anti-rabbit (Abberior), STAR 635P anti-mouse (Abberior), Alexa Fluor488 anti-mouse (Life  
667 Technologies), Alexa Fluor Plus 488 anti-rabbit (Invitrogen). Following the incubation with  
668 the secondary antibodies, the cells were incubated with 0.4 $\mu$ M Hoechst for 5mins, and finally  
669 washed 3 times with PBS and mounted with ProLong<sup>TM</sup> Gold antifade mounting medium  
670 (ThermoFisher Scientific). Widefield images were taken using a 100x objective on a Leica  
671 DMI8 widefield microscope attached to a Leica DFC9000 GTC camera. Z-stacks were taken  
672 and then processed with ImageJ.

673

674 **Ethics statement**

675 All animal experiments were performed according to European guidelines and regulations and  
676 the German Animal Welfare Act (Tierschutzgesetz) and executed following the guidelines of  
677 the Society of Laboratory Animal Science (GV-SOLAS) and of the Federation of European  
678 Laboratory Animal Science Associations (FELASA). All experiments were approved by the  
679 responsible German authorities (Regierungspräsidium Karlsruhe) or Animal Care and Use



680 ommittee of Institut Pasteur (CETEA 2013-0093) and the French Ministry of Higher Education  
681 and Research (MESR 01324).

682

### 683 **Animal work**

684 For all experiments female 4-6-week-old Naval Medical Research Institute (NMRI) mice,  
685 Swiss or C57BL/6 mice obtained from Charles River or Janvier laboratories were used.  
686 Transgenic parasites were generated in the *Plasmodium berghei* ANKA background (Vincke  
687 & Bafort, 1968) either directly in wild type or from wild type derived . Parasites were cultivated  
688 in NMRI or Swiss CD1 mice while transmission experiments with sporozoites were performed  
689 in C57Bl/6 mice only. Animal experiments conducted at the Institut Pasteur were approved by  
690 the Animal Care and Use Committee of Institut Pasteur (CETEA 2013-0093) and the French  
691 Ministry of Higher Education and Research (MESR 01324) and were performed in accordance  
692 with European guidelines and regulations.

693

### 694 **Statistical analysis**

695 Statistical analysis was performed using GraphPad Prism 8.0 (GraphPad, San Diego, CA,  
696 USA). Data sets were either tested with a Mann Whitney or Kruskal Wallis test. A value of  
697  $p < 0.05$  was considered significant.

698

### 699 **Acknowledgements**

700 We thank Miriam Reinig and rotating student helpers and the team of the Centre for the  
701 Production and Infection of Anopheles (CEPIA, Institut Pasteur) for rearing *Anopheles*  
702 *stephensi* mosquitoes as well as Markus Ganter for helpful discussions and comments on the  
703 manuscript. We acknowledge the microscopy support from the Infectious Diseases Imaging  
704 Platform (IDIP) at the Center for Integrative Infectious Disease Research and the expert help  
705 from the Mass Spectrometry and Proteomics Core Facility at the Center for Molecular Biology  
706 (ZMBH) of Heidelberg University.

707

### 708 **Funding**

709 This work was funded by grants from the Human Frontier Science Program (RGY0071/2011),  
710 the Institut Pasteur, the Agence National de la Recherche (ANR, French National Research  
711 Agency) / Deutsche Forschungsgemeinschaft (DFG, German Research Foundation) – project  
712 number SporoSTOP ANR-19-CE15-0027, the French Government’s Investissement d’Avenir  
713 program, Laboratoire d’Excellence “Integrative Biology of Emerging Infectious Diseases” -

714 project number ANR-10-LABX-62-IBEID, the DFG project number 240245660 – SFB 1129–  
715 and the European Research Council (ERC StG 281719). FF is a member of CellNetworks  
716 Cluster of excellence at Heidelberg University and SFB 1129.

717

## 718 **Competing interests**

719 The authors declare no competing interests.

720

## 721 **Author contributions**

722 J.K. and F.F. designed the project; J.K., P.F. C.F. J.M.M., D.B., C.L., J.R., J.G. and F.F.  
723 performed research; all authors analyzed data; M.M. and R.A. supervised the *Toxoplasma* and  
724 *in vivo* imaging parts, respectively. J.K. and F.F. wrote the paper with input from all authors.

725

726

## 727 **REFERENCES**

728 Aleshnick, M., Ganusov, V. V., Nasir, G., Yenokyan, G., & Sinnis, P. (2020). Experimental determination of the  
729 force of malaria infection reveals a non-linear relationship to mosquito sporozoite loads. *PLoS Pathogens*.  
730 <https://doi.org/10.1371/journal.ppat.1008181>

731 Aliprandini, E., Tavares, J., Panatieri, R. H., Thiberge, S., Yamamoto, M. M., Silvie, O., Ishino, T., Yuda, M.,  
732 Dartevelle, S., Traincard, F., Boscardin, S. B., & Amino, R. (2018). Cytotoxic anti-circumsporozoite  
733 antibodies target malaria sporozoites in the host skin. In *Nature Microbiology*.  
734 <https://doi.org/10.1038/s41564-018-0254-z>

735 Amino, R., Giovannini, D., Thiberge, S., Gueirard, P., Boisson, B., Dubremetz, J. F., Prévost, M. C., Ishino, T.,  
736 Yuda, M., & Ménard, R. (2008). Host Cell Traversal Is Important for Progression of the Malaria Parasite  
737 through the Dermis to the Liver. *Cell Host and Microbe*. <https://doi.org/10.1016/j.chom.2007.12.007>

738 Amino, R., Thiberge, S., Blazquez, S., Baldacci, P., Renaud, O., Shorte, S., & Ménard, R. (2007). Imaging malaria  
739 sporozoites in the dermis of the mammalian host. *Nature Protocols*, 2(7), 1705–1712.  
740 <https://doi.org/10.1038/nprot.2007.120>

741 Amino, R., Thiberge, S., Martin, B., Celli, S., Shorte, S., Frischknecht, F., & Ménard, R. (2006). Quantitative  
742 imaging of Plasmodium transmission from mosquito to mammal. *Nature Medicine*.  
743 <https://doi.org/10.1038/nm1350>

744 Bane, K. S., Lepper, S., Kehrler, J., Sattler, J. M., Singer, M., Reinig, M., Klug, D., Heiss, K., Baum, J., Mueller,  
745 A. K., & Frischknecht, F. (2016). The Actin Filament-Binding Protein Coronin Regulates Motility in  
746 Plasmodium Sporozoites. *PLoS Pathogens*. <https://doi.org/10.1371/journal.ppat.1005710>

747 Bhanot, P., Frevert, U., Nussenzweig, V., & Persson, C. (2003). Defective sorting of the thrombospondin-related  
748 anonymous protein (TRAP) inhibits Plasmodium infectivity. *Molecular and Biochemical Parasitology*.  
749 [https://doi.org/10.1016/S0166-6851\(02\)00295-5](https://doi.org/10.1016/S0166-6851(02)00295-5)

750 Bushell, E., Gomes, A. R., Sanderson, T., Anar, B., Girling, G., Herd, C., Metcalf, T., Modrzynska, K., Schwach,  
751 F., Martin, R. E., Mather, M. W., McFadden, G. I., Parts, L., Rutledge, G. G., Vaidya, A. B., Wengelnik, K.,  
752 Rayner, J. C., & Billker, O. (2017). Functional Profiling of a Plasmodium Genome Reveals an Abundance

- 753 of Essential Genes. *Cell*. <https://doi.org/10.1016/j.cell.2017.06.030>
- 754 Carey, A. F., Singer, M., Bargieri, D., Thiberge, S., Frischknecht, F., Ménard, R., & Amino, R. (2014). Calcium  
755 dynamics of *Plasmodium berghei* sporozoite motility. *Cellular Microbiology*.  
756 <https://doi.org/10.1111/cmi.12289>
- 757 Clemens, J., & Moorthy, V. (2016). Implementation of RTS,S/AS01 Malaria Vaccine — The Need for Further  
758 Evidence. *New England Journal of Medicine*. <https://doi.org/10.1056/nejme1606007>
- 759 Coppi, A., Natarajan, R., Pradel, G., Bennett, B. L., James, E. R., Roggero, M. A., Corradin, G., Persson, C.,  
760 Tewari, R., & Sinnis, P. (2011). The malaria circumsporozoite protein has two functional domains, each  
761 with distinct roles as sporozoites journey from mosquito to mammalian host. *Journal of Experimental*  
762 *Medicine*. <https://doi.org/10.1084/jem.20101488>
- 763 Cowman, A. F., Healer, J., Marapana, D., & Marsh, K. (2016). Malaria: Biology and Disease. In *Cell*.  
764 <https://doi.org/10.1016/j.cell.2016.07.055>
- 765 Douglas, R. G., Reinig, M., Neale, M., & Frischknecht, F. (2018). Screening for potential prophylactics targeting  
766 sporozoite motility through the skin. *Malaria Journal*, 17(1), 319. [https://doi.org/10.1186/s12936-018-2469-](https://doi.org/10.1186/s12936-018-2469-0)  
767 0
- 768 Dubremetz, J. F., Garcia-Réguet, N., Conseil, V., & Fourmaux, M. N. (1998). Apical organelles and host-cell  
769 invasion by Apicomplexa. *International Journal for Parasitology*. [https://doi.org/10.1016/S0020-](https://doi.org/10.1016/S0020-7519(98)00076-9)  
770 7519(98)00076-9
- 771 Egarter, S., Andenmatten, N., Jackson, A. J., Whitelaw, J. A., Pall, G., Black, J. A., Ferguson, D. J. P., Tardieux,  
772 I., Mogilner, A., & Meissner, M. (2014). The Toxoplasma Acto-MyoA Motor Complex Is Important but Not  
773 Essential for Gliding Motility and Host Cell Invasion. *PLOS ONE*, 9(3), e91819.  
774 <https://doi.org/10.1371/journal.pone.0091819>
- 775 Formaglio, P., Tavares, J., Ménard, R., & Amino, R. (2014). Loss of host cell plasma membrane integrity following  
776 cell traversal by *Plasmodium* sporozoites in the skin. *Parasitology International*, 63(1), 237–244.  
777 <https://doi.org/10.1016/j.parint.2013.07.009>
- 778 Frénal, K., Polonais, V., Marq, J. B., Stratmann, R., Limenitakis, J., & Soldati-Favre, D. (2010). Functional  
779 dissection of the apicomplexan glideosome molecular architecture. *Cell Host and Microbe*.  
780 <https://doi.org/10.1016/j.chom.2010.09.002>
- 781 Frischknecht, F., Baldacci, P., Martin, B., Zimmer, C., Thiberge, S., Olivo-Marin, J. C., Shorte, S. L., & Ménard,  
782 R. (2004). Imaging movement of malaria parasites during transmission by *Anopheles* mosquitoes. *Cellular*  
783 *Microbiology*. <https://doi.org/10.1111/j.1462-5822.2004.00395.x>
- 784 Gomes-Santos, C. S. S., Braks, J., Prudêncio, M., Carret, C., Gomes, A. R., Pain, A., Feltwell, T., Khan, S. M.,  
785 Waters, A., Janse, C. J., Mair, G. R., & Mota, M. M. (2011). Transition of *Plasmodium* sporozoites into liver  
786 stage-like forms is regulated by the RNA binding protein Pumilio. *PLoS Pathogens*, 7(5), e1002046.  
787 <https://doi.org/10.1371/journal.ppat.1002046>
- 788 Gould, S. B., Tham, W. H., Cowman, A. F., McFadden, G. I., & Waller, R. F. (2008). Alveolins, a new family of  
789 cortical proteins that define the protist infrakingdom Alveolata. *Molecular Biology and Evolution*.  
790 <https://doi.org/10.1093/molbev/msn070>
- 791 Granados, M. E., Soriano, E., & Saavedra-Molina, A. (1997). Use of pluronic acid F-127 with Fluo-3/AM probe  
792 to determine intracellular calcium changes elicited in bean protoplasts. *Phytochemical Analysis*.  
793 [https://doi.org/10.1002/\(SICI\)1099-1565\(199707\)8:4<204::AID-PCA354>3.0.CO;2-L](https://doi.org/10.1002/(SICI)1099-1565(199707)8:4<204::AID-PCA354>3.0.CO;2-L)

- 794 Harding, C. R., & Frischknecht, F. (2020). The Riveting Cellular Structures of Apicomplexan Parasites. In *Trends*  
795 *in Parasitology*. <https://doi.org/10.1016/j.pt.2020.09.001>
- 796 Hopp, C. S., Kanatani, S., Archer, N. K., Miller, R. J., Liu, H., Chiou, K. K., Miller, L. S., & Sinnis, P. (2021).  
797 Comparative intravital imaging of human and rodent malaria sporozoites reveals the skin is not a species -  
798 specific barrier. *EMBO Molecular Medicine*. <https://doi.org/10.15252/emmm.201911796>
- 799 Hunt, A., Russell, M. R. G., Wagener, J., Kent, R., Carmeille, R., Peddie, C. J., Collinson, L., Heaslip, A., Ward,  
800 G. E., & Treeck, M. (2019). Differential requirements for cyclase-associated protein (CAP) in actin-  
801 dependent processes of *Toxoplasma gondii*. *ELife*, 8. <https://doi.org/10.7554/eLife.50598>
- 802 Ishino, T., Murata, E., Tokunaga, N., Baba, M., Tachibana, M., Thongkukiatkul, A., Tsuboi, T., & Torii, M.  
803 (2019). Rhoptry neck protein 2 expressed in *Plasmodium* sporozoites plays a crucial role during invasion of  
804 mosquito salivary glands. *Cellular Microbiology*. <https://doi.org/10.1111/cmi.12964>
- 805 Ishino, T., Orito, Y., Chinzei, Y., & Yuda, M. (2006). A calcium-dependent protein kinase regulates *Plasmodium*  
806 ookinete access to the midgut epithelial cell. *Molecular Microbiology*, 59(4), 1175–1184.  
807 <https://doi.org/10.1111/j.1365-2958.2005.05014.x>
- 808 Janse, C. J., Franke-Fayard, B., Mair, G. R., Ramesar, J., Thiel, C., Engelmann, S., Matuschewski, K., Gemert, G.  
809 J. Van, Sauerwein, R. W., & Waters, A. P. (2006). High efficiency transfection of *Plasmodium berghei*  
810 facilitates novel selection procedures. *Molecular and Biochemical Parasitology*.  
811 <https://doi.org/10.1016/j.molbiopara.2005.09.007>
- 812 Jayabalasingham, B., Bano, N., & Coppens, I. (2010). Metamorphosis of the malaria parasite in the liver is  
813 associated with organelle clearance. *Cell Research*, 20(9), 1043–1059. <https://doi.org/10.1038/cr.2010.88>
- 814 Jimah, J. R., Salinas, N. D., Sala-Rabanal, M., Jones, N. G., David Sibley, L., Nichols, C. G., Schlesinger, P. H.,  
815 & Tolia, N. H. (2016). Malaria parasite CelTOS targets the inner leaflet of cell membranes for pore-  
816 dependent disruption. *ELife*. <https://doi.org/10.7554/eLife.20621>
- 817 Kaiser, G., De Niz, M., Zuber, B., Burda, P. C., Kornmann, B., Heussler, V. T., & Stanway, R. R. (2016). High  
818 resolution microscopy reveals an unusual architecture of the *Plasmodium berghei* endoplasmic reticulum.  
819 *Molecular Microbiology*. <https://doi.org/10.1111/mmi.13490>
- 820 Kariu, T., Ishino, T., Yano, K., Chinzei, Y., & Yuda, M. (2006). CelTOS, a novel malarial protein that mediates  
821 transmission to mosquito and vertebrate hosts. *Molecular Microbiology*. <https://doi.org/10.1111/j.1365-2958.2005.05024.x>
- 822
- 823 Kehrer, J., Frischknecht, F., & Mair, G. R. (2016). Proteomic analysis of the *Plasmodium berghei* gametocyte  
824 egressome and vesicular bioid of osmiophilic body proteins identifies merozoite trap-like protein (MTRAP)  
825 as an essential factor for parasite transmission. *Molecular and Cellular Proteomics*.  
826 <https://doi.org/10.1074/mcp.M116.058263>
- 827 Kehrer, J., Ricken, D., Strauss, L., Pietsch, E., Heinze, J. M., & Frischknecht, F. (2020). APEX-based proximity  
828 labeling in *Plasmodium* identifies a membrane protein with dual functions during mosquito infection 2 3.  
829 *BioRxiv*.
- 830 Kehrer, J., Singer, M., Lemgruber, L., Silva, P. A. G. C., Frischknecht, F., & Mair, G. R. (2016). A Putative Small  
831 Solute Transporter Is Responsible for the Secretion of G377 and TRAP-Containing Secretory Vesicles  
832 during *Plasmodium* Gamete Egress and Sporozoite Motility. *PLoS Pathogens*.  
833 <https://doi.org/10.1371/journal.ppat.1005734>
- 834 Khater, E. I., Sinden, R. E., & Dessens, J. T. (2004). A malaria membrane skeletal protein is essential for normal

- 835 morphogenesis, motility, and infectivity of sporozoites. *Journal of Cell Biology*.  
836 <https://doi.org/10.1083/jcb.200406068>
- 837 Klug, D., & Frischknecht, F. (2017). Motility precedes egress of malaria parasites from oocysts. *ELife*.  
838 <https://doi.org/10.7554/eLife.19157>
- 839 Kudryashev, M., Münter, S., Lemgruber, L., Montagna, G., Stahlberg, H., Matuschewski, K., Meissner, M.,  
840 Cyrklaff, M., & Frischknecht, F. (2012). Structural basis for chirality and directional motility of Plasmodium  
841 sporozoites. *Cellular Microbiology*. <https://doi.org/10.1111/j.1462-5822.2012.01836.x>
- 842 Lindner, S. E., Mikolajczak, S. A., Vaughan, A. M., Moon, W., Joyce, B. R., Sullivan, W. J., & Kappe, S. H. I.  
843 (2013). Perturbations of Plasmodium Puf2 expression and RNA-seq of Puf2-deficient sporozoites reveal a  
844 critical role in maintaining RNA homeostasis and parasite transmissibility. *Cellular Microbiology*.  
845 <https://doi.org/10.1111/cmi.12116>
- 846 Lindner, S. E., Swearingen, K. E., Harupa, A., Vaughan, A. M., Sinnis, P., Moritz, R. L., & Kappe, S. H. I. (2013).  
847 Total and putative surface proteomics of malaria parasite salivary gland sporozoites. *Molecular and Cellular*  
848 *Proteomics*. <https://doi.org/10.1074/mcp.M112.024505>
- 849 Lindner, S. E., Swearingen, K. E., Shears, M. J., Walker, M. P., Vrana, E. N., Hart, K. J., Minns, A. M., Sinnis,  
850 P., Moritz, R. L., & Kappe, S. H. I. (2019). Transcriptomics and proteomics reveal two waves of translational  
851 repression during the maturation of malaria parasite sporozoites. *Nature Communications*.  
852 <https://doi.org/10.1038/s41467-019-12936-6>
- 853 Matuschewski, K. (2017). Vaccines against malaria—still a long way to go. In *FEBS Journal*.  
854 <https://doi.org/10.1111/febs.14107>
- 855 Matuschewski, K., Ross, J., Brown, S. M., Kaiser, K., Nussenzweig, V., & Kappe, S. H. I. (2002). Infectivity-  
856 associated changes in the transcriptional repertoire of the malaria parasite sporozoite stage. *Journal of*  
857 *Biological Chemistry*. <https://doi.org/10.1074/jbc.M207315200>
- 858 Meijering, E., Dzyubachyk, O., & Smal, I. (2012). Methods for cell and particle tracking. *Methods in Enzymology*,  
859 *504*, 183–200. <https://doi.org/10.1016/B978-0-12-391857-4.00009-4>
- 860 Ménard, R., Sultan, A. A., Cortes, C., Altszuler, R., Van Dijk, M. R., Janse, C. J., Waters, A. P., Nussenzweig, R.  
861 S., & Nussenzweig, V. (1997). Circumsporozoite protein is required for development of malaria sporozoites  
862 in mosquitoes. *Nature*. <https://doi.org/10.1038/385336a0>
- 863 Montagna, G. N., Buscaglia, C. A., Münter, S., Goosmann, C., Frischknecht, F., Brinkmann, V., & Matuschewski,  
864 K. (2012). Critical role for heat shock protein 20 (HSP20) in migration of malarial sporozoites. *Journal of*  
865 *Biological Chemistry*. <https://doi.org/10.1074/jbc.M111.302109>
- 866 Murugan, R., Scally, S. W., Costa, G., Mustafa, G., Thai, E., Decker, T., Bosch, A., Prieto, K., Levashina, E. A.,  
867 Julien, J.-P., & Wardemann, H. (2020). Evolution of protective human antibodies against Plasmodium  
868 falciparum circumsporozoite protein repeat motifs. *Nature Medicine*, *26*(7), 1135–1145.  
869 <https://doi.org/10.1038/s41591-020-0881-9>
- 870 Muthinja, M. J., Ripp, J., Hellmann, J. K., Haraszi, T., Dahan, N., Lemgruber, L., Battista, A., Schütz, L., Fackler,  
871 O. T., Schwarz, U. S., Spatz, J. P., & Frischknecht, F. (2017). Microstructured Blood Vessel Surrogates  
872 Reveal Structural Tropism of Motile Malaria Parasites. *Advanced Healthcare Materials*.  
873 <https://doi.org/10.1002/adhm.201601178>
- 874 Nesvizhskii, A. I., Keller, A., Kolker, E., & Aebersold, R. (2003). A statistical model for identifying proteins by  
875 tandem mass spectrometry. *Analytical Chemistry*, *75*(17), 4646–4658. <https://doi.org/10.1021/ac0341261>



- 876 Otto, T. D., Böhme, U., Jackson, A. P., Hunt, M., Franke-Fayard, B., Hoeijmakers, W. A. M., Religa, A. A.,  
877 Robertson, L., Sanders, M., Ogun, S. A., Cunningham, D., Erhart, A., Billker, O., Khan, S. M., Stunnenberg,  
878 H. G., Langhorne, J., Holder, A. A., Waters, A. P., Newbold, C. I., ... Janse, C. J. (2014). A comprehensive  
879 evaluation of rodent malaria parasite genomes and gene expression. *BMC Medicine*.  
880 <https://doi.org/10.1186/s12915-014-0086-0>
- 881 Pelham, R. J., & Wang, Y. L. (1997). Cell locomotion and focal adhesions are regulated by substrate flexibility.  
882 *Proceedings of the National Academy of Sciences of the United States of America*.  
883 <https://doi.org/10.1073/pnas.94.25.13661>
- 884 Pirahmadi, S., Zakeri, S., Mehrizi, A. A., Karimi, L., & Djadid, N. D. (2019). Heterogeneity in the acquisition of  
885 naturally acquired antibodies to cell-traversal protein for ookinetes and sporozoites (CelTOS) and  
886 thrombospondin-related adhesion protein (TRAP) of *Plasmodium falciparum* in naturally infected patients  
887 from unstable mal. *Acta Tropica*. <https://doi.org/10.1016/j.actatropica.2018.12.014>
- 888 Plattner, F., Yarovinsky, F., Romero, S., Didry, D., Carlier, M.-F., Sher, A., & Soldati-Favre, D. (2008).  
889 *Toxoplasma* profilin is essential for host cell invasion and TLR11-dependent induction of an interleukin-12  
890 response. *Cell Host & Microbe*, 3(2), 77–87. <https://doi.org/10.1016/j.chom.2008.01.001>
- 891 Prudêncio, M., Rodriguez, A., & Mota, M. M. (2006). The silent path to thousands of merozoites: The *Plasmodium*  
892 liver stage. In *Nature Reviews Microbiology*. <https://doi.org/10.1038/nrmicro1529>
- 893 Ripp, J., Kehrer, J., Smyrnakou, X., Tisch, N., Tavares, J., Amino, R., Ruiz de Almodovar, C., & Frischknecht, F.  
894 (2021). Malaria parasites differentially sense environmental elasticity during transmission. *EMBO*  
895 *Molecular Medicine*. <https://doi.org/10.15252/emmm.202113933>
- 896 Risco-Castillo, V., Topçu, S., Marinach, C., Manzoni, G., Bigorgne, A. E., Briquet, S., Baudin, X., Lebrun, M.,  
897 Dubremetz, J. F., & Silvie, O. (2015). Malaria sporozoites traverse host cells within transient vacuoles. *Cell*  
898 *Host and Microbe*. <https://doi.org/10.1016/j.chom.2015.10.006>
- 899 Rompikuntal, P. K., Foe, I. T., Deng, B., Bogyo, M., & Ward, G. E. (2020). Blocking palmitoylation of  
900 *Toxoplasma gondii* myosin light chain 1 disrupts glideosome composition but has little impact on parasite  
901 motility. In *bioRxiv*. <https://doi.org/10.1101/2020.08.13.250399>
- 902 Saini, E., Zeeshan, M., Brady, D., Pandey, R., Kaiser, G., Koreny, L., Kumar, P., Thakur, V., Tatiya, S., Katris,  
903 N. J., Limenitakis, R. S., Kaur, I., Green, J. L., Bottrill, A. R., Guttery, D. S., Waller, R. F., Heussler, V.,  
904 Holder, A. A., Mohammed, A., ... Tewari, R. (2017). Photosensitized INA-Labelled protein 1 (PhIL1) is  
905 novel component of the inner membrane complex and is required for *Plasmodium* parasite development.  
906 *Scientific Reports*. <https://doi.org/10.1038/s41598-017-15781-z>
- 907 Santos, J. M., Egarter, S., Zuzarte-Luís, V., Kumar, H., Moreau, C. A., Kehrer, J., Pinto, A., da Costa, M., Franke-  
908 Fayard, B., Janse, C. J., Frischknecht, F., & Mair, G. R. (2017). Malaria parasite LIMP protein regulates  
909 sporozoite gliding motility and infectivity in mosquito and mammalian hosts. *ELife*.  
910 <https://doi.org/10.7554/eLife.24109>
- 911 Santos, J. M., Kehrer, J., Franke-Fayard, B., Frischknecht, F., Janse, C. J., & Mair, G. R. (2015). The *Plasmodium*  
912 palmitoyl-S-acyl-transferase DHHC2 is essential for ookinete morphogenesis and malaria transmission.  
913 *Scientific Reports*. <https://doi.org/10.1038/srep16034>
- 914 Schindelin, J., Arganda-Carreras, I., Frise, E., Kaynig, V., Longair, M., Pietzsch, T., Preibisch, S., Rueden, C.,  
915 Saalfeld, S., Schmid, B., Tinevez, J. Y., White, D. J., Hartenstein, V., Eliceiri, K., Tomancak, P., & Cardona,  
916 A. (2012). Fiji: An open-source platform for biological-image analysis. In *Nature Methods*.



- 917 <https://doi.org/10.1038/nmeth.2019>
- 918 Silvie, O., Franetich, J. F., Charrin, S., Mueller, M. S., Siau, A., Bodescot, M., Rubinstein, E., Hannoun, L.,  
919 Charoenvit, Y., Kocken, C. H., Thomas, A. W., Van Gemert, G. J., Sauerwein, R. W., Blackman, M. J.,  
920 Anders, R. F., Pluschke, G., & Mazier, D. (2004). A Role for Apical Membrane Antigen 1 during Invasion  
921 of Hepatocytes by *Plasmodium falciparum* Sporozoites. *Journal of Biological Chemistry*.  
922 <https://doi.org/10.1074/jbc.M311331200>
- 923 Singer, M., & Frischknecht, F. (2021). Fluorescent tagging of *Plasmodium* circumsporozoite protein allows  
924 imaging of sporozoite formation but blocks egress from oocysts. *Cellular Microbiology*.  
925 <https://doi.org/10.1111/cmi.13321>
- 926 Spreng, B., Fleckenstein, H., Kübler, P., Di Biagio, C., Benz, M., Patra, P., Schwarz, U. S., Cyrklaff, M., &  
927 Frischknecht, F. (2019). Microtubule number and length determine cellular shape and function in  
928 *Plasmodium*. *The EMBO Journal*. <https://doi.org/10.15252/emboj.2018100984>
- 929 Steel, R. W. J., Pei, Y., Camargo, N., Kaushansky, A., Dankwa, D. A., Martinson, T., Nguyen, T., Betz, W.,  
930 Cardamone, H., Vigdorovich, V., Dambrauskas, N., Carbonetti, S., Vaughan, A. M., Sather, D. N., & Kappe,  
931 S. H. I. (2018). *Plasmodium yoelii* S4/CelTOS is important for sporozoite gliding motility and cell traversal.  
932 *Cellular Microbiology*. <https://doi.org/10.1111/cmi.12817>
- 933 Stortz, J. F., Del Rosario, M., Singer, M., Wilkes, J. M., Meissner, M., & Das, S. (2019). Formin-2 drives  
934 polymerisation of actin filaments enabling segregation of apicoplasts and cytokinesis in *Plasmodium*  
935 *falciparum*. *ELife*, 8. <https://doi.org/10.7554/eLife.49030>
- 936 Sultan, A. A., Thathy, V., Frevert, U., Robson, K. J. H., Crisanti, A., Nussenzweig, V., Nussenzweig, R. S., &  
937 Ménard, R. (1997). TRAP is necessary for gliding motility and infectivity of *Plasmodium* sporozoites. *Cell*.  
938 [https://doi.org/10.1016/S0092-8674\(00\)80511-5](https://doi.org/10.1016/S0092-8674(00)80511-5)
- 939 Swearingen, K. E., Lindner, S. E., Shi, L., Shears, M. J., Harupa, A., Hopp, C. S., Vaughan, A. M., Springer, T.  
940 A., Moritz, R. L., Kappe, S. H. I., & Sinnis, P. (2016). Interrogating the *Plasmodium* Sporozoite Surface:  
941 Identification of Surface-Exposed Proteins and Demonstration of Glycosylation on CSP and TRAP by Mass  
942 Spectrometry-Based Proteomics. *PLoS Pathogens*. <https://doi.org/10.1371/journal.ppat.1005606>
- 943 Tavares, J., Formaglio, P., Thiberge, S., Mordelet, E., Van Rooijen, N., Medvinsky, A., Ménard, R., & Amino, R.  
944 (2013). Role of host cell traversal by the malaria sporozoite during liver infection. *Journal of Experimental*  
945 *Medicine*. <https://doi.org/10.1084/jem.20121130>
- 946 Thathy, V., Fujioka, H., Gantt, S., Nussenzweig, R., Nussenzweig, V., & Ménard, R. (2002). Levels of  
947 circumsporozoite protein in the *Plasmodium* oocyst determine sporozoite morphology. *EMBO Journal*.  
948 <https://doi.org/10.1093/emboj/21.7.1586>
- 949 Tilley, L. D., Krishnamurthy, S., Westwood, N. J., & Ward, G. E. (2014). Identification of TgCBAP, a novel  
950 cytoskeletal protein that localizes to three distinct subcompartments of the *Toxoplasma gondii* pellicle. *PLoS*  
951 *One*, 9(6), e98492. <https://doi.org/10.1371/journal.pone.0098492>
- 952 Tiono, A. B., Nébié, I., Anagnostou, N., Coulibaly, A. S., Bowyer, G., Lam, E., Bougouma, E. C., Ouedraogo, A.,  
953 Yaro, J. B. B., Barry, A., Roberts, R., Rampling, T., Bliss, C., Hodgson, S., Lawrie, A., Ouedraogo, A.,  
954 Imoukhuede, E. B., Ewer, K. J., Viebig, N. K., ... Sirima, S. B. (2018). First field efficacy trial of the ChAd63  
955 MVA ME-TRAP vectored malaria vaccine candidate in 5-17 months old infants and children. *PLoS ONE*.  
956 <https://doi.org/10.1371/journal.pone.0208328>
- 957 Tremp, A. Z., Carter, V., Saeed, S., & Dessens, J. T. (2013). Morphogenesis of *Plasmodium* zoites is uncoupled

- 958 from tensile strength. *Molecular Microbiology*. <https://doi.org/10.1111/mmi.12297>
- 959 Vanderberg, J. P. (1974). Studies on the Motility of Plasmodium Sporozoites. *The Journal of Protozoology*.  
960 <https://doi.org/10.1111/j.1550-7408.1974.tb03693.x>
- 961 Vanderberg, J. P., & Frevort, U. (2004). Intravital microscopy demonstrating antibody-mediated immobilisation  
962 of Plasmodium berghei sporozoites injected into skin by mosquitoes. *International Journal for Parasitology*.  
963 <https://doi.org/10.1016/j.ijpara.2004.05.005>
- 964 Vincke, L., & Bafort, J. (1968). [Results of 2 years of observation of the cyclical transmission of Plasmodium  
965 berghei]. *Ann Soc Belges Med Trop Parasitol Mycol*, 48, 439–454.
- 966 Volkmann, K., Pfander, C., Burstroem, C., Ahras, M., Goulding, D., Rayner, J. C., Frischknecht, F., Billker, O.,  
967 & Brochet, M. (2012). The alveolin IMC1h is required for normal ookinete and sporozoite motility  
968 behaviour and host colonisation in plasmodium berghei. *PLoS ONE*.  
969 <https://doi.org/10.1371/journal.pone.0041409>
- 970 Wang, Q., Fujioka, H., & Nussenzweig, V. (2005). Exit of plasmodium sporozoites from oocysts is an active  
971 process that involves the circumsporozoite protein. *PLoS Pathogens*.  
972 <https://doi.org/10.1371/journal.ppat.0010009>
- 973 WHO. (2020). WHO World Malaria Report 2020. In *Malaria report 2020*.
- 974

975 FIGURES AND FIGURE LEGENDS

976

Figure 1

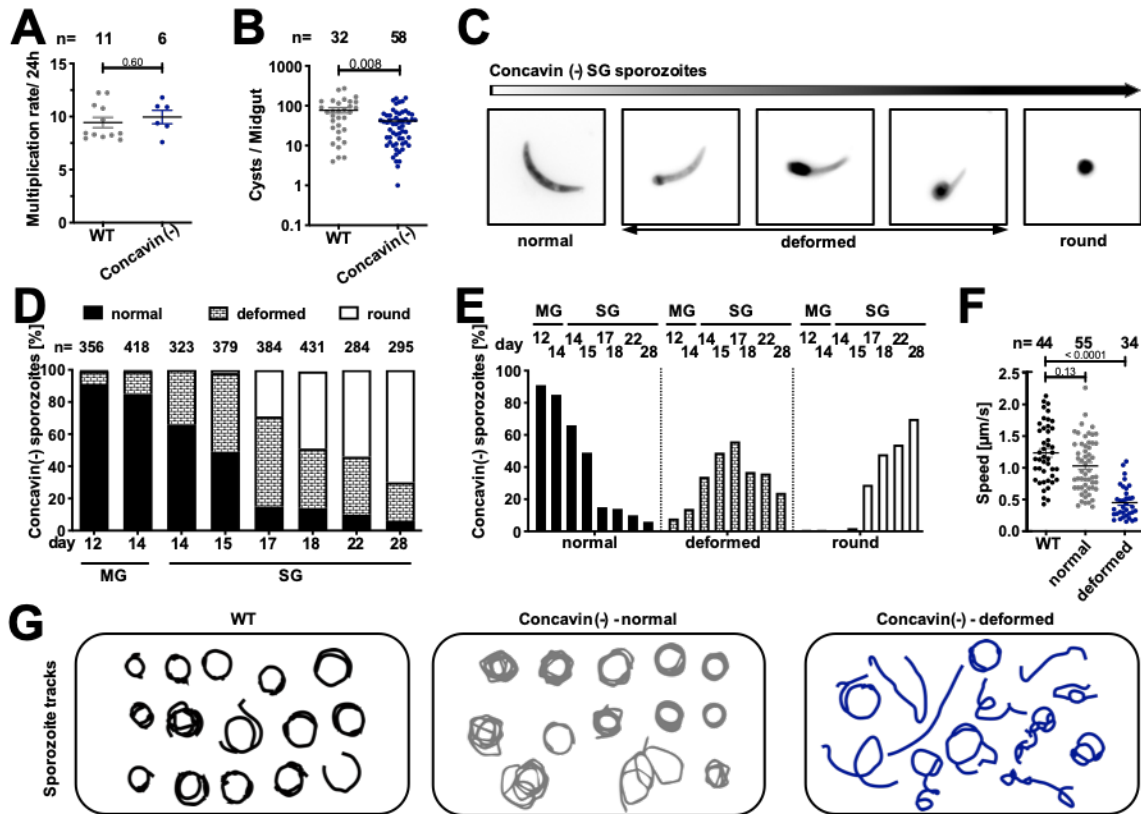

977

978

979 **Figure 1 | Deletion of *concavin* leads to rounding of sporozoites**

980 (A) Blood-stage growth rate of *concavin*(-) parasites in comparison to wild type. Data points represent parasites  
 981 growing in individual mice, n indicates total number. P-value is calculated using the Mann Whitney test. Shown  
 982 is the mean  $\pm$  SEM. (B) Oocyst development in the mosquito observed between d12-17 post infection. Data points  
 983 represent individual midguts, n indicates total number. P-value is calculated using the Mann Whitney test. Shown  
 984 is the mean  $\pm$  SEM. (C) Mosquito infections resulted in deformed sporozoites in the salivary gland. Shown are  
 985 example images of sporozoites arranged to illustrate their rounding up over time. (D-E) Quantification of  
 986 sporozoite rounding up over time in the midgut (MG) and salivary gland (SG) at the indicated days post infection.  
 987 Sporozoites were classified as either normal, deformed or round as illustrated in C. (F) Average speed of salivary  
 988 gland sporozoites. Data points represent individual sporozoites, n indicates total number. P-values are calculated  
 989 using the Kruskal Wallis test followed by the Dunns multiple comparison test. (G) Selected trajectories of  
 990 manually tracked sporozoites.

## Figure 2

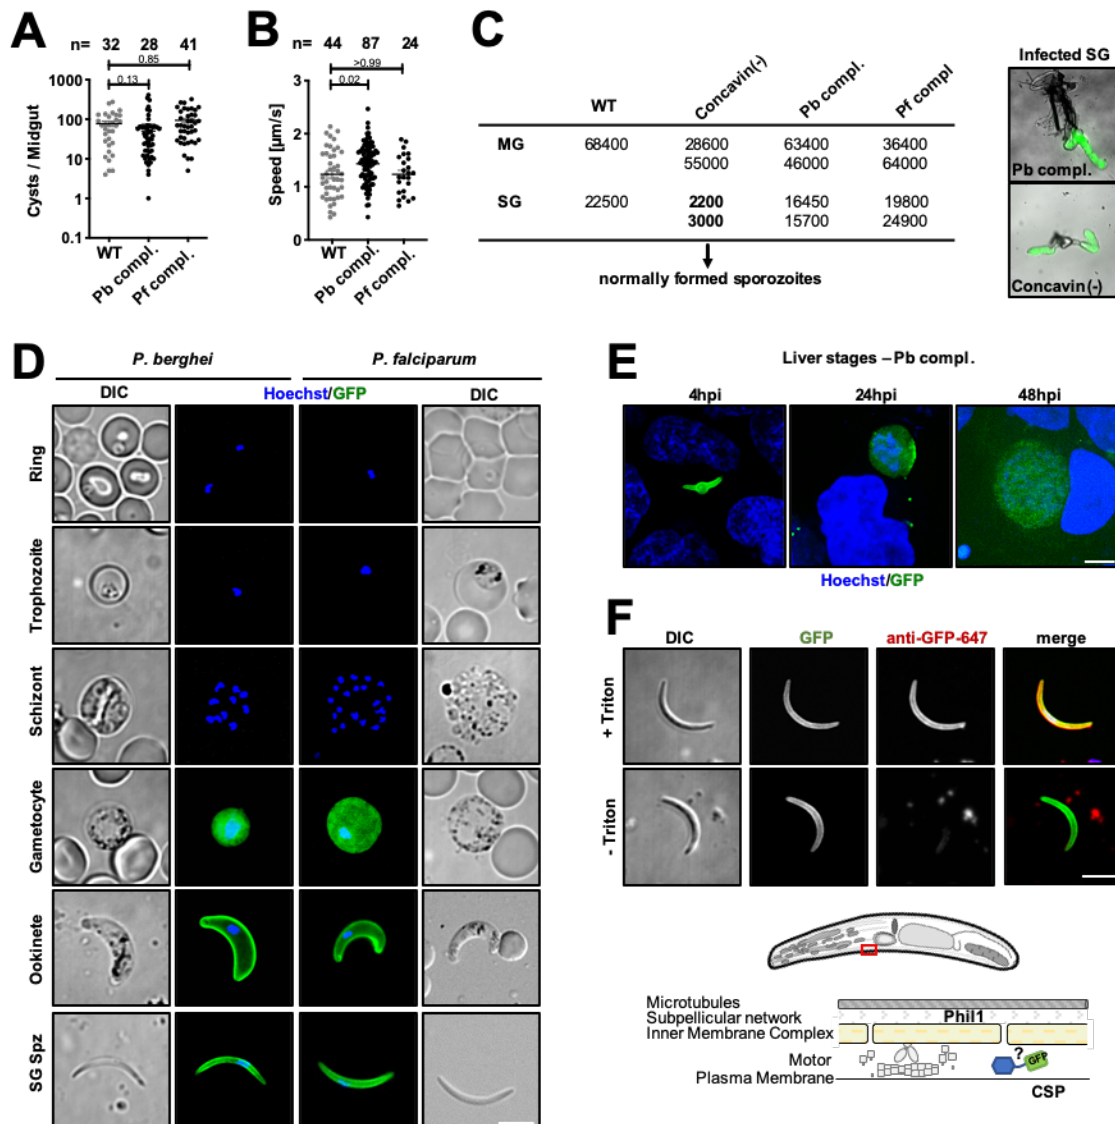

991  
992

### Figure 2 | Concavin-GFP localizes to the periphery of ookinetes and sporozoites

993 (A) Oocyst development of *concavin(-)* parasites complemented with either the *P. berghei* gene or the *P.*  
994 *falciparum* orthologue fused to GFP. Data points represent individual midguts observed between d12-17 post  
995 infection. Shown is the mean  $\pm$  SEM. P-values are calculated using the Kruskal Wallis test followed by the Dunns  
996 multiple comparison test. (B) Average speed of salivary gland sporozoites. Data points represent individual  
997 sporozoites. Shown is the mean  $\pm$  SEM. P-values are calculated using the Kruskal Wallis test followed by the  
998 Dunns multiple comparison test. (C) Sum table of mosquito infections of wild type, *concavin(-)* and complemented  
999 lines expressing either *P. berghei* (Pb) or *P. falciparum* (Pf) concavin-GFP. Numbers determined on d17 post  
1000 mosquito infection. For each counting at least 20 mosquitos were dissected. Please note for *concavin(-)* parasites  
1001 only normally shaped sporozoites were counted. (D) Pb concavin-GFP and Pf concavin-GFP localization in blood  
1002 and mosquito stages. Nuclei (blue) stained with Hoechst. Scale bar: 5  $\mu$ m. (E) Localization of *P. berghei*  
1003 concavin-GFP in liver stages. Nuclei (blue) stained with Hoechst. Scale bar: 5  $\mu$ m. (F) Immunofluorescence  
1004 images of permeabilized and unpermeabilized concavin-GFP expressing salivary gland sporozoites stained with  
1005 an anti-GFP antibody. Note that a GFP signal could only be detected after permeabilization, excluding concavin  
1006 localization on the parasite surface as illustrated in the model. Scale bar: 5 $\mu$ m.  
1007

## Figure 3

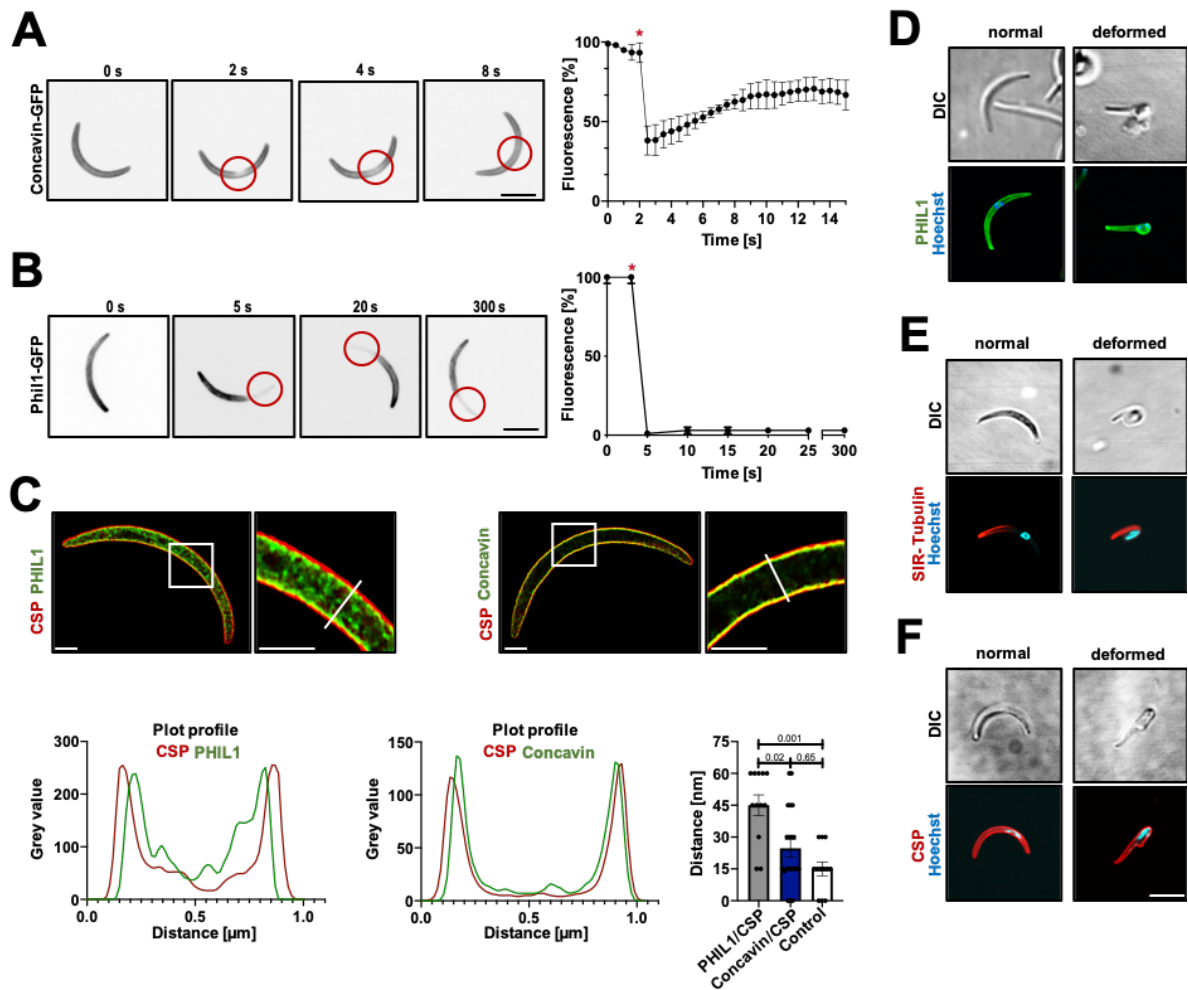

1008  
1009  
1010  
1011  
1012  
1013  
1014  
1015  
1016  
1017  
1018  
1019  
1020  
1021

### Figure 3 | FRAP reveals dynamics of concavin-GFP and fixed PhiL1-GFP

(A, B) Time series of concavin-GFP (A) PhiL1-GFP (B) sporozoites before and after bleaching and quantification of the fluorescence signal over time. \* indicates time of bleaching. (C) Super resolution (STED) imaging of PhiL1-GFP and CSP as well as concavin-GFP and CSP. Cells were stained with an anti-GFP antibody in combination with Atto-594 (green) in addition to an anti-CSP staining in combination with Atto-647. Images were deconvolved using the Richardson-Lucy algorithm. The distance between the 2 signal peaks was measured using the plot profile of the respective channels in Fiji. Data points represent distance in individual sporozoites at the center of the cell. P-values are calculated using the Kruskal Wallis test followed by the Dunns multiple comparison test. Scale bar: 1  $\mu\text{m}$ . (D) Localization of PhiL1-GFP (green) in *concavin(-)* parasites. Nuclei (blue) stained with Hoechst. (E) Localization of SiR-Tubulin (red) in *concavin(-)* parasites. Nuclei (blue) stained with Hoechst. (F) Localization of CSP (red) in *concavin(-)* parasites. Nuclei (blue) stained with Hoechst. Scale bar: 5  $\mu\text{m}$ .



## Figure 4

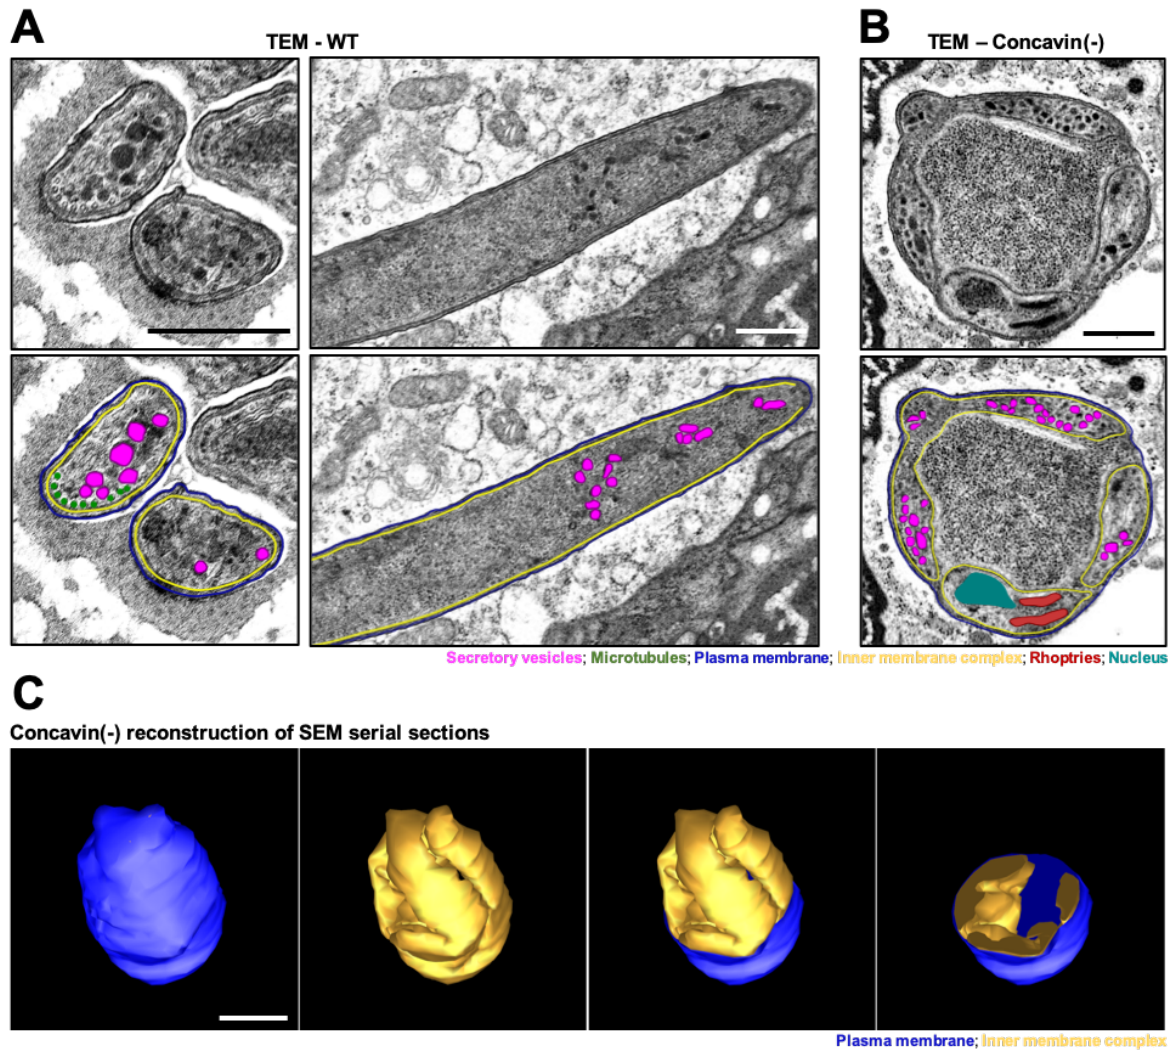

1022  
1023  
1024  
1025  
1026  
1027  
1028  
1029  
1030  
1031  
1032  
1033  
1034  
1035  
1036  
1037

### Figure 4 | Cytoplasmic IMC extensions in *concavin(-)* sporozoites.

(A) Transmission electron micrographs of wild type sporozoites with highlighted secretory organelles in magenta, IMC in yellow, microtubules in green and plasma membrane in blue. (B) Transmission electron microscopy of *concavin(-)* sporozoites with highlighted secretory organelles as in A; rhoptries in red and nucleus in turquoise. Scale bars 500 nm (C) Reconstruction of SEM serial sections of a complete rounded up *concavin(-)* sporozoite; plasma membrane in blue and IMC in yellow. Scale bar 1 $\mu$ m.



## Figure 5

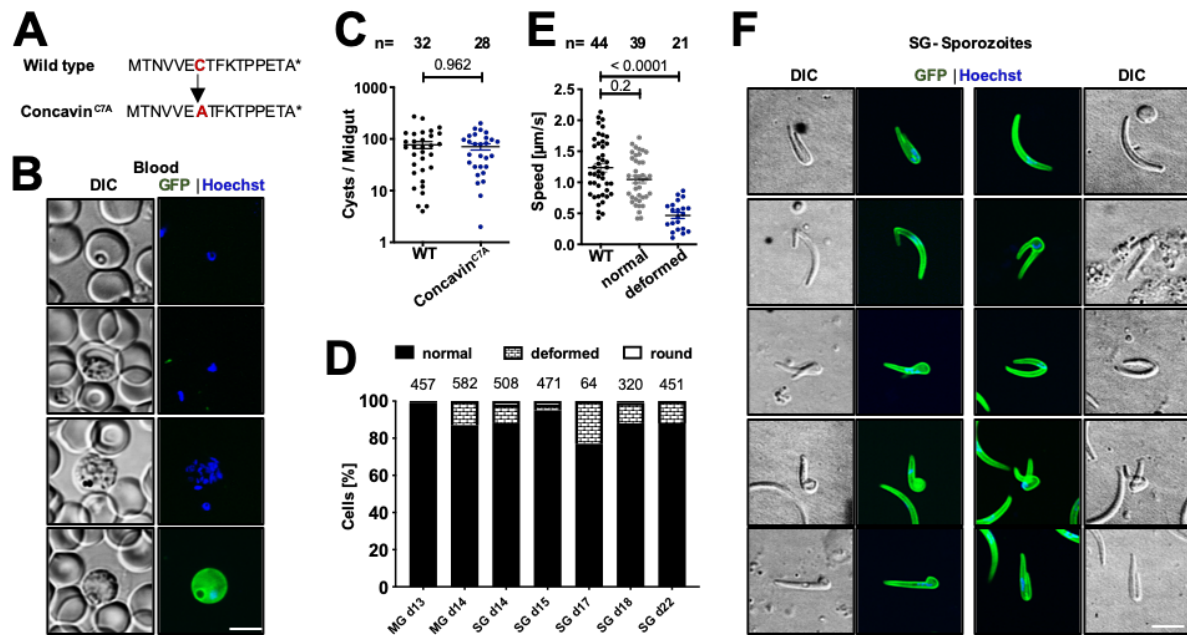

1038

1039

### Figure 5 | Limited impact of potential palmitoylation for shape maintenance

1040

(A) Cysteine 7 is predicted to be palmitoylated and was changed into alanine in the concavirin<sup>C7A</sup>-GFP mutant. (B)

1041

Expression and localization of concavirin<sup>C7A</sup>-GFP in blood stage parasites. (C) Oocysts number in infected

1042

mosquitoes. Data points represent individual midguts observed between d12-17 post infection. Shown is the mean

1043

± SEM. P-value calculated using the Mann Whitney test. (D) Quantification of concavirin<sup>C7A</sup>-GFP cell shapes at the

1044

indicated days from midgut (MG) or salivary gland (SG) derived sporozoites. Numbers above bars indicate

1045

investigated sporozoites. (E) Average speed of salivary gland sporozoites. Data points represent individual

1046

sporozoites. Shown is the mean ± SEM. P-values are calculated using the Kruskal Wallis test followed by the

1047

Dunns multiple comparison test. (F) Localization of concavirin<sup>C7A</sup>-GFP in normal and deformed sporozoites. Scale

1048

bar: 5 μm.

## Figure 6

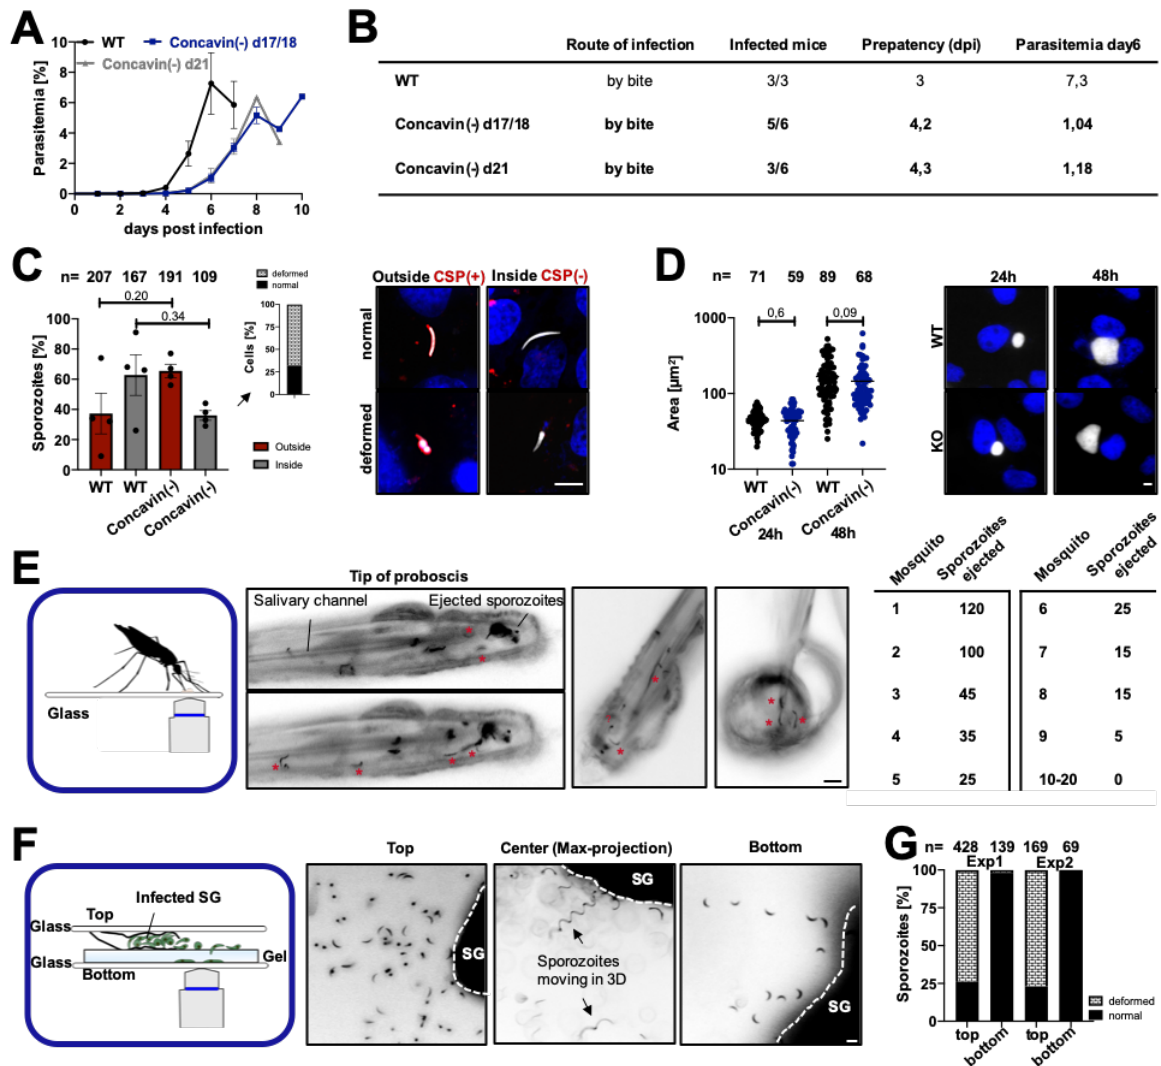

1049  
1050  
1051  
1052  
1053  
1054  
1055  
1056  
1057  
1058  
1059  
1060  
1061  
1062  
1063  
1064  
1065  
1066  
1067  
1068

### Figure 6 | Concavin is essential for efficient transmission by mosquitoes

(A) Growth curve of blood stage parasites in C57BL/6 mice infected by the bite of 10 mosquitoes at two different times post infection as indicated. Shown is the mean  $\pm$  SEM. (B) Sum table of infected mice from A with prepatency period (time to detect a blood stage infection) and parasitemia on day 6. Note that in *concavin(-)* infected mice not all develop a blood stage infection. (C) Liver cell invasion assay of *concavin-gfp* and *concavin(-)* parasites. Parasites are positively stained for CSP in case they remain extracellular. Both, normal and deformed parasites were detected intracellularly. Graph shows quantification of CSP positive (red) and negative (grey) sporozoites. Data points represent individual experiments with n indicating the numbers of sporozoites observed. Shown is the mean  $\pm$  SEM. P-values are calculated using the Mann Whitney test. Scale bar: 5  $\mu$ m. (D) Liver-stage development of *concavin(-)* parasites compared to wildtype, both expressing cytoplasmic GFP (white). Parasite size was measured 24h and 48h post infection. Data points represent individual parasites. Shown is the mean  $\pm$  SEM. P-values calculated using the Mann Whitney test. Scale bar: 5  $\mu$ m. (E) Sporozoite ejection of immobilized *concavin(-)* infected mosquitoes on glass slides and quantification of ejected sporozoites from 20 mosquitoes. \* indicates individual sporozoites in the ejected saliva. Scale bar: 10  $\mu$ m. (F, G) Only normally shaped *concavin(-)* sporozoites released by salivary glands move on helical paths (arrows) through polyacrylamide gels that mimic the skin (F). Quantification of two individual experiments (G): only normal shaped sporozoites were able to migrate through the gel.

## Figure 7

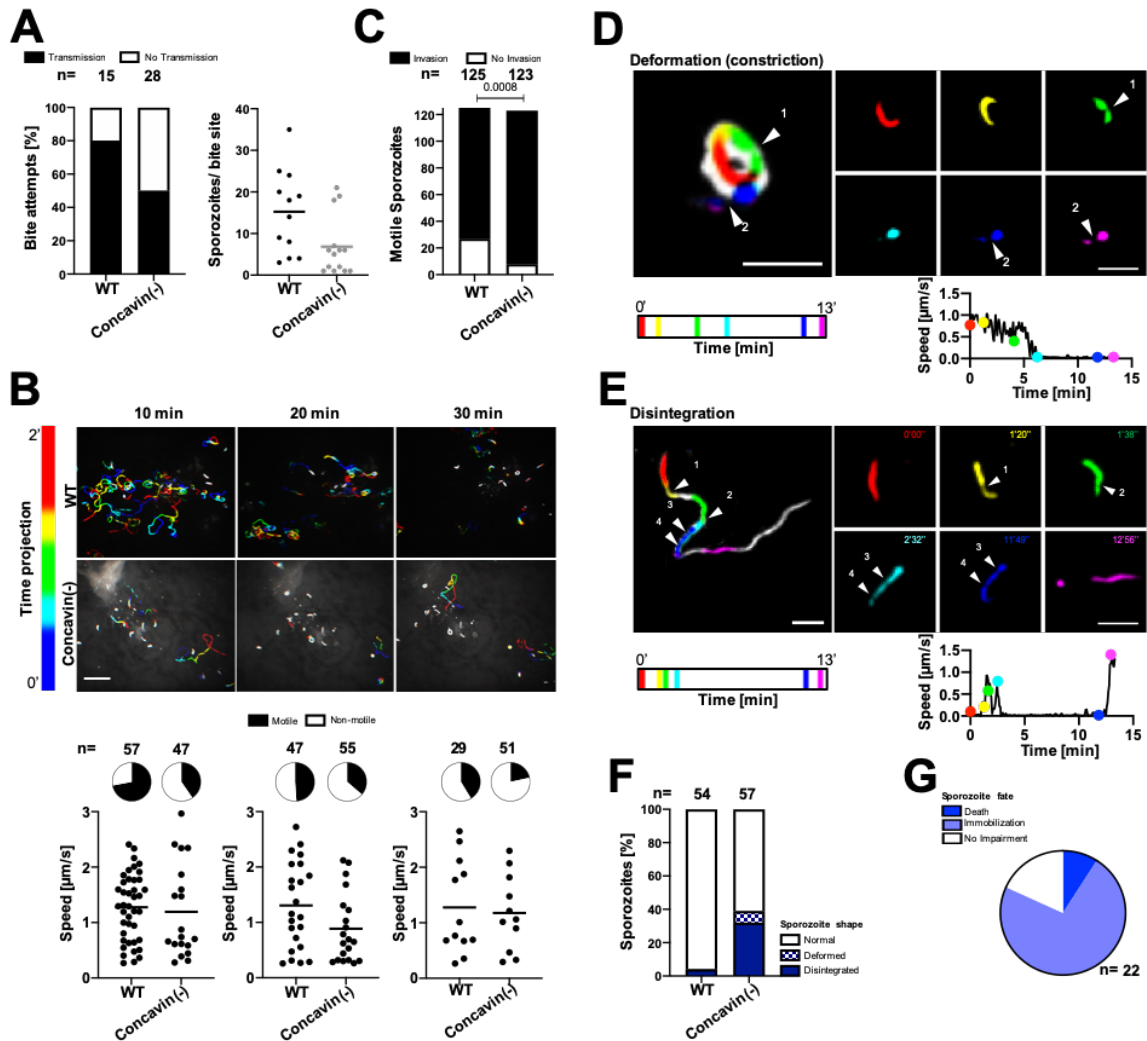

1069  
1070  
1071  
1072  
1073  
1074  
1075  
1076  
1077  
1078  
1079  
1080  
1081  
1082  
1083  
1084  
1085

### Figure 7 | Migrating *concavin(-)* sporozoites lose their cellular integrity

(A) Percentage of mosquitoes depositing WT or *concavin(-)* sporozoites in the skin of a mouse during a bite (left) and sporozoites deposited during a mosquito bite (right). (B) Maximum fluorescence intensity projections encoded by color for time from movies showing migrating sporozoites after mosquito-bite transmission. Graphs and camembert diagrams below show fraction of motile and immotile sporozoites after 10, 20 and 30 minutes of recording, numbers analysed as well as sporozoite speed. Pooled data from 4-5 WT or 5-8 *concavin(-)* bite sites per time point. Scale bar: 50  $\mu\text{m}$ . (C) Motile WT or *concavin(-)* sporozoites entering blood vessels during the first hour following micro-injection. Number above bars shows numbers of sporozoites observed. Pooled data from four WT or five *concavin(-)* experiments. (D) Deformation and (E) disintegration of *concavin(-)* sporozoites migrating in the skin. Individual images corresponding to the frames shown on the right are indicated in distinct colours in the maximum projection (left) of 13-min movies. Arrowheads indicate constrictions of the parasites. Graphs below time-lapse show that deformation and disintegration are preceded by a decrease in speed. Color of dots correspond to the time-points displayed in the time-lapse images. Scale bars: 10  $\mu\text{m}$ . (F) Percentage of deformation and disintegration events observed in 54 WT and 57 *concavin(-)* sporozoites that were tracked for at least 10 min. Pooled data from 5 WT or 10 *concavin(-)* bite sites. (G) Consequence of deformation and disintegration from the 22 sporozoites in F include immobilization and parasite death.

## Figure S1

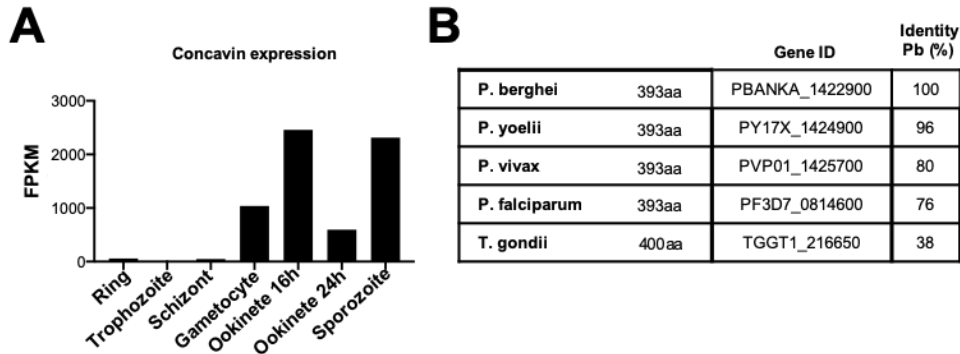

1087

1088 **Supplementary Figure S1 | (A)** RNAseq abundance of concavirin in blood and mosquito stage parasites **(B)**  
 1089 Sequence identity of *P. berghei* concavirin with *P. yoelii*, *P. vivax*, *P. falciparum* and *T. gondii*.

1090

1091

1092

## Figure S2A

```

PF3D7_0814600 1 MTNIVVCTFKTPEETAKAPDNAVIWNRFOYCDEKGWYLSNHEDEIALRPTTFNDKRIKFL
PBANKA_1422900 1 MTNIVVCTFKTPEETAKAPDNAVIWNRFOYCDEKGWYLSNHEDEIALRPTTFNDGRIKFL
PY17X_1424900 1 MTNIVVCTFKTPEETAKAPDNAVIWNRFOYCDEKGWYLSNHEDEIALRPTTFNDGRIKFL
PVP01_1425700 1 MTNIVVCTFKTPEETAKAPDNAIWNRSFOYCDEKGWYLSNHEDEIALRPTTFSDGRIKFL

PF3D7_0814600 61 VOLPEIPSEFESILSGRYDAKAWGKEDCVVIEGDKDVHISLPLCKEKINYNHERFPPTF
PBANKA_1422900 61 POLDTIPEEFESVLCGKYDAKAWGKDDCNLVIEGDKDVHISLPLCKEKINYNHERFPPTF
PY17X_1424900 61 POLDTIPEEFESVLCGKYDAKAWGKDDCNLVIEGDKDVHISLPLCKEKINYNHERFPPTF
PVP01_1425700 61 PQLKTIPEEFESVLCGKYDAKAWGKDDCNLVIEGDKDVHISLPLCKEKINYNHERFPPTF

PF3D7_0814600 121 LKNWKIIVSILNEHVTLIRINAEETALIININEKKNVTVKSVDFNNGFGLCVNPHENLAIAY
PBANKA_1422900 121 LKNSKIIVSLLNENLTVIRINLETALLICINEKKSIVVKSINFNNGFACVNPYSNLAIAY
PY17X_1424900 121 LKNSKIIVSLLNENLTVIRINLETGLLISINEKKSIVVKSINFNNGFACVNPYSNLAIAY
PVP01_1425700 121 LKNWKIIVGMLNEHITVIRINLETAIIVSINEKSNVTVKCVNDFNNGFGLCVNPHENLAIAY

PF3D7_0814600 181 GDFALSSLKKCELIQNIPEHCCKWGFVHLFKWGHIIIPKDEIKLIPSPGLKLGKKIDT
PBANKA_1422900 181 GGFAPNDLKKCEIVPTITHSCEWAFVHLFKWGHIIIPKDLEIKIPSSGLKLGKKVDT
PY17X_1424900 181 GGFAPNDLKKCEIVPTITHSCEWAFVHLFKWGHIIIPKDLEIKIPSSGLKLGKKVDT
PVP01_1425700 181 GDFALSELKKCELVPNITHSCEWGFVHLFKWGHIIIPKDEIKLIPSPGLKLGKKIDT

PF3D7_0814600 241 LAIVSIPPNIIHVKIDGPKCIRKLEYGQDYNITAIKSSSEDIDYVLFDFGQLLKYEFSS
PBANKA_1422900 241 IAIIVSIPPNIIHVKIDGPKCIRKVEYQDYNITAIKSSSEDIDYVLFDFGQLLKYEFSS
PY17X_1424900 241 IAIIVSIPPNIIHVKIDGPKCIRKVEYQDYNITAIKSSSEDIDYVLFDFGQLLKYEFSS
PVP01_1425700 241 VAIIVSIPPNIIHVKIDGPKCIRKLEYGQDYSITAIKSSSEDIDYVLFDFGQLLKYEFSS

PF3D7_0814600 301 DIRLNKPEKGRSLHSAKLCINKSKEVTSFIFQETKNCKILLGNSCPDNLGHLNLSQTI
PBANKA_1422900 301 DTRLNKEGKGSINHAKLKCITSKSKEVTSFIFQESPNCKVLLGNSCPDNLGHLNLSQTI
PY17X_1424900 301 DTRLNKEGKGSINHAKLKCITSKSKEVTSFVFOESQNCCKVLLGNSCPDNLGHLNLSQTI
PVP01_1425700 301 DTRLNKVGGKRSINYAKLKCINKSKEVTSFVFOATANSKLLLDNSCPDNLGHLNLSQTI

PF3D7_0814600 361 AIFDAEIGEYLSHPQGLQLTSVFNTLSYPLDKE
PBANKA_1422900 361 SIFDAEIGEYLSHPQGLLLTEAFEKLSYFVENA
PY17X_1424900 361 SIFDAEIGEYLSHPQGLLLTEVFEKLSYFVENA
PVP01_1425700 361 SVFDAEIGEYLSHPQGLQLTEVFNTLSYFPEKE
    
```

1093

## Figure S2B

|                |     |          |            |        |            |          |         |        |           |        |        |         |      |       |       |       |        |   |   |   |   |   |   |   |   |   |   |   |   |   |     |   |   |    |      |   |   |   |   |     |   |   |   |   |   |   |   |   |   |   |   |   |   |   |   |   |
|----------------|-----|----------|------------|--------|------------|----------|---------|--------|-----------|--------|--------|---------|------|-------|-------|-------|--------|---|---|---|---|---|---|---|---|---|---|---|---|---|-----|---|---|----|------|---|---|---|---|-----|---|---|---|---|---|---|---|---|---|---|---|---|---|---|---|---|
| TGGT1_216650   | 1   | MERQATCR | YDPL-VEVPL | PPGI   | VIWTOHQVYD | GAGWLALP | DREKLEL | KPTRWS | DGRLRFL   |        |        |         |      |       |       |       |        |   |   |   |   |   |   |   |   |   |   |   |   |   |     |   |   |    |      |   |   |   |   |     |   |   |   |   |   |   |   |   |   |   |   |   |   |   |   |   |
| PBANKA_1422900 | 1   | MTNVVFC  | FKTPPETAKA | PDNAVI | WNRFOYCD   | EKGWYSL  | SNHEIT  | TLRPTI | FNDGRIKFL |        |        |         |      |       |       |       |        |   |   |   |   |   |   |   |   |   |   |   |   |   |     |   |   |    |      |   |   |   |   |     |   |   |   |   |   |   |   |   |   |   |   |   |   |   |   |   |
| TGGT1_216650   | 60  | DPIDEL   | PEPFKAV    | QSGKFD | VKWCW      | KRGDCK   | LGIEG   | DKTVFL | KSPI      | SPDVAV | VVHAER | LPTF    |      |       |       |       |        |   |   |   |   |   |   |   |   |   |   |   |   |   |     |   |   |    |      |   |   |   |   |     |   |   |   |   |   |   |   |   |   |   |   |   |   |   |   |   |
| PBANKA_1422900 | 61  | PQLDTI   | PEEFES     | VLCGK  | YDAKAW     | GKDDCN   | LVIEG   | EKDVH  | ISL       | GLKEK  | INYNH  | KERFPTF |      |       |       |       |        |   |   |   |   |   |   |   |   |   |   |   |   |   |     |   |   |    |      |   |   |   |   |     |   |   |   |   |   |   |   |   |   |   |   |   |   |   |   |   |
| TGGT1_216650   | 120 | PKSWK    | PLVFIL     | NOSL   | AMFR       | L        | TENL    | CLLV   | VAEK      | D      | KTMN   | ISCVD   | YNGG | FACTH | PSTN  | MVVAY |        |   |   |   |   |   |   |   |   |   |   |   |   |   |     |   |   |    |      |   |   |   |   |     |   |   |   |   |   |   |   |   |   |   |   |   |   |   |   |   |
| PBANKA_1422900 | 121 | LKNSKI   | IIVSL      | LNENL  | TVIRI      | N        | LETAL   | LICINE | KKSV      | IVKS   | INFN   | NGFAC   | VN   | PYSN  | LAITY |       |        |   |   |   |   |   |   |   |   |   |   |   |   |   |     |   |   |    |      |   |   |   |   |     |   |   |   |   |   |   |   |   |   |   |   |   |   |   |   |   |
| TGGT1_216650   | 180 | GSYVL    | KNF        | EKLPS  | COAI       | PKML     | TASGD   | WGF    | FVQ       | FYP    | WGF    | FFIP    | KS   | VEL   | TRP   | QAVL  | GAVGMG |   |   |   |   |   |   |   |   |   |   |   |   |   |     |   |   |    |      |   |   |   |   |     |   |   |   |   |   |   |   |   |   |   |   |   |   |   |   |   |
| PBANKA_1422900 | 181 | GGFAFN   | ---        | D      | LKK        | CEIV     | PTI     | THSG   | CEW       | AFV    | H      | L       | F    | K     | W     | G     | H      | I | V | I | P | K | D | L | E | L | K | I | P | S | S   | G | L | -- | KLIG |   |   |   |   |     |   |   |   |   |   |   |   |   |   |   |   |   |   |   |   |   |
| TGGT1_216650   | 240 | KKVDT    | I          | GLV    | FH         | PPN      | M       | F      | I         | N      | V      | K       | L    | D     | I     | P     | A      | K | T | R | A | L | O | F | G | K | D | F | Q | V | T   | A | K | T  | S    | E | T | D | I | E   | V | F | L | V | I | D | G | O | L | A |   |   |   |   |   |   |
| PBANKA_1422900 | 236 | KKVDT    | I          | A      | I          | V        | S       | L      | P         | P      | N      | I       | Q    | I     | H     | V     | K      | I | D | G | E | K | - | C | I | R | K | V | E | Y | G   | O | D | Y  | N    | I | T | A | I | K   | S | E | S | D | I | D | I | Y | V | L | F | D | G | O | L | L |
| TGGT1_216650   | 300 | KYNYS    | F          | D      | I          | R        | I       | N      | K         | P      | E      | R       | P    | K     | H     | T     | D      | N | I | H | F | K | C | S | C | D | A | E | E | K | K   | P | D | P  | K    | F | K | L | S | A   | C | K | D | S | V | I | L | L | E | Q | G | C | P | S | G | N |
| PBANKA_1422900 | 295 | KYEF     | S          | Y      | D          | T        | R       | L      | N         | K      | E      | G       | K    | G     | K     | S     | I      | N | H | A | K | L | K | C | T | S | K | S | K | E | --- | V | S | T  | F    | I | F | Q | E | S   | P | N | C | K | V | L | L | G | S | N | C | P | T | D | N |   |
| TGGT1_216650   | 360 | PDD      | Q          | L      | V          | S        | E       | Q      | L         | I      | A      | C       | F    | D     | A     | E     | V      | C | L | Y | S | T | H | P | P | A | L | K | L | C | D   | A | F | T  | D    | V | A | I | R | --- |   |   |   |   |   |   |   |   |   |   |   |   |   |   |   |   |
| PBANKA_1422900 | 351 | LGH      | -          | M      | L          | C        | N       | Q      | T         | S      | I      | S       | I    | F     | D     | A     | E      | I | G | E | Y | Q | S | H | P | O | G | L | L | T | E   | A | F | E  | K    | L | S | Y | P | V   | E | N | A |   |   |   |   |   |   |   |   |   |   |   |   |   |

1094  
1095  
1096  
1097  
1098  
1099

Supplementary Figure S2 | (A) Clustal Omega Multiple sequence alignment of *Plasmodium* spp. (B) Clustal Omega Multiple sequence alignment with the *T. gondii* orthologue. Potential C-terminal palmitoylation site is highlighted in red.



## Figure S3

### Genotyping of pL 24 PBANKA\_142290 concavin(-) and concavin(-) NS

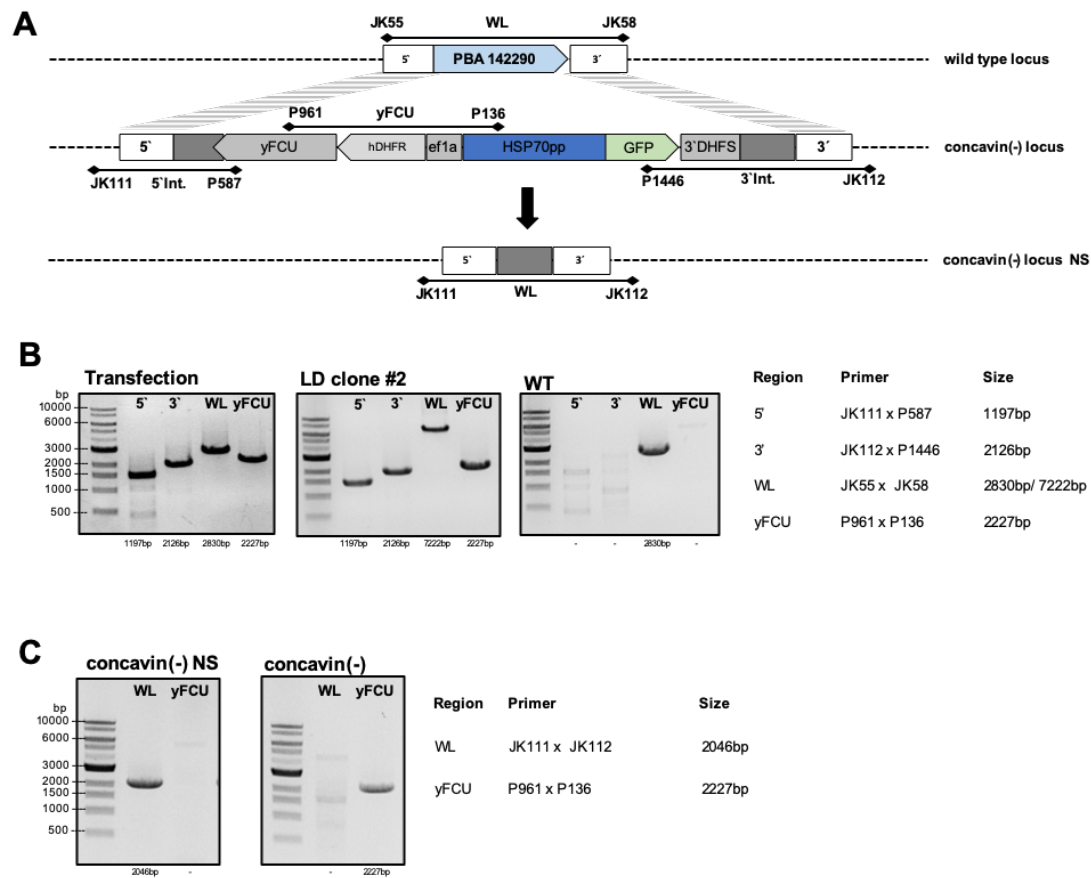

1100

1101 **Supplementary Figure S3 | Generation of *concavin(-)* and *concavin(-) NS* parasites via double homologous**  
 1102 **recombination. (A)** Cartoon showing the cloning strategy and primers used for genotyping. **(B)** Genotyping PCRs  
 1103 of non-clonal *concavin(-)* parasites directly after transfection and after limiting dilution. Agarose gel pictures show  
 1104 5`integration, 3`integration as well as wildtype and selection marker as indicated in A. Expected amplicon sizes  
 1105 are indicated on the right. **(C)** Genotyping PCRs of *concavin(-)* parasites after looping out the selection cassette.  
 1106 Expected amplicon sizes are indicated on the right.  
 1107



## Figure S4

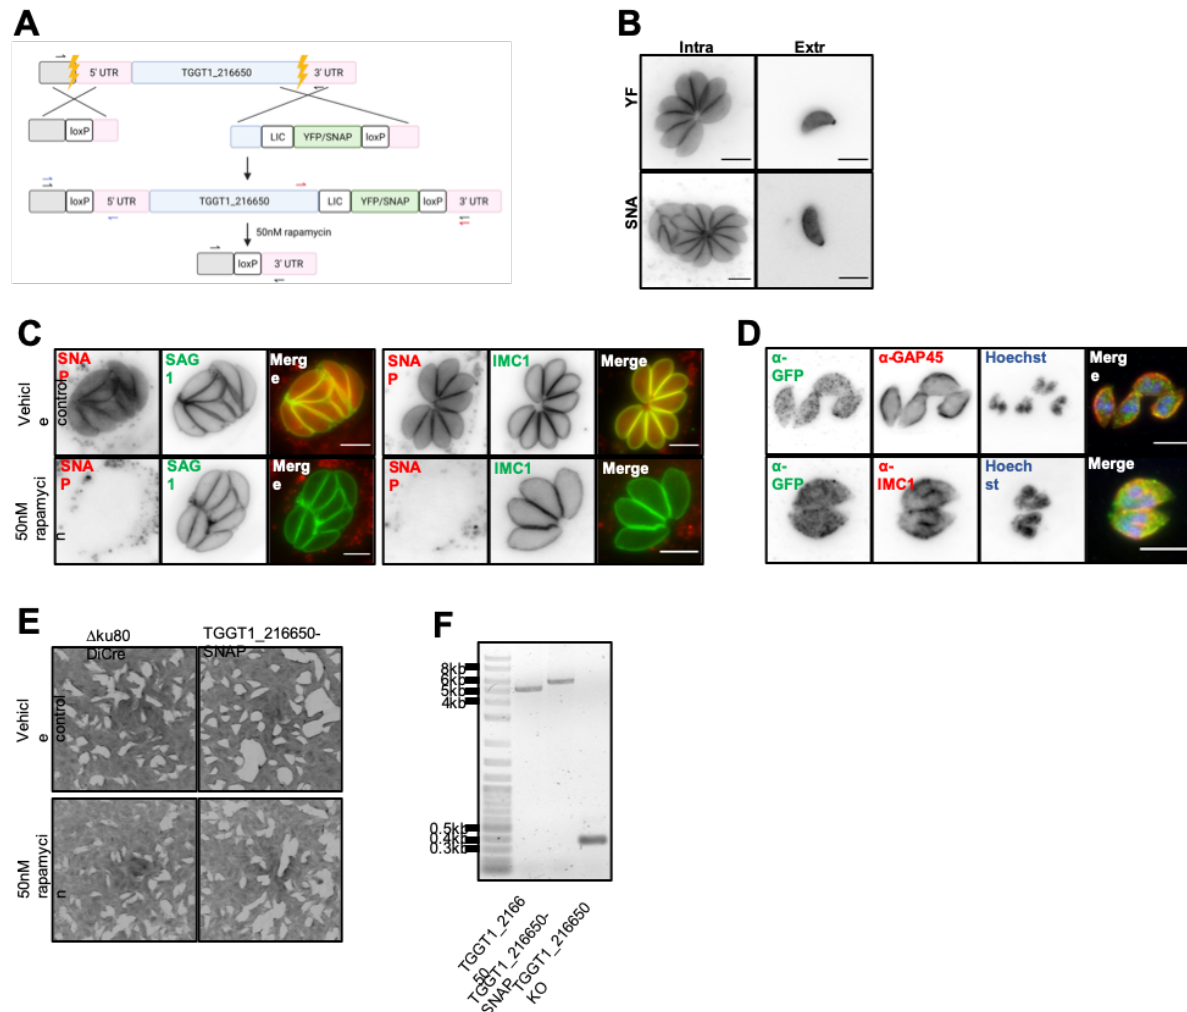

1108  
1109  
1110  
1111  
1112  
1113  
1114  
1115  
1116  
1117  
1118  
1119  
1120  
1121  
1122  
1123  
1124

**Supplementary Figure S4 | TGGT1\_216650 is non-essential in *T. gondii* tachyzoites.** (A) CRISPR/Cas9 was used to induce double strand breaks. The DNA repair templates used were designed with homology arms to favour homologous recombination. The approximate position of the 5' UTR was estimated based on the TGME49\_216650 annotation on ToxoDB. The LIC sequence was used as a linker between the gene and the tags. Correct integration was confirmed via PCR and sequencing, the primer binding sites as indicated with red and blue arrows. Upon addition of 50 nM rapamycin, the Cre recombinase subunits expressed in the parasite strain dimerise, excising the floxed sequence. (B) Images show the localisation of TGGT1-216650 endogenously tagged with YFP and SNAP tags. Parasites were imaged live in both intracellular and extracellular conditions. (C) SAG1 and IMC1 were internally and C-terminally tagged with HALO-tag respectively using the same protocol as in panel A. Upon knockout of TGGT1\_216650, no phenotype was observed. The parasites were imaged live. (D) The parasites were fixed and antibodies were used to amplify the signal. The gene of interest was not observed at the daughter cells while still inside the mother cell during division. (E) 7-day plaque assays. Knockout of the gene of interest following addition of 50 nM rapamycin had no effect on the fitness of the parasites. (F) A knockout line was successfully obtained and can be maintained in culture. Confirmation of successful knockout via both PCR and sequencing, the primer binding sites as indicated with black arrows in panel A. All scale bars: 5  $\mu$ m.

## Figure S5

**pL 79 PBANKA\_142290-GFP complementation**  
**pL 82 PF3D7\_0814600-GFP complementation**  
**pL 120 PBANKA\_142290<sup>C7A</sup>-GFP complementation**

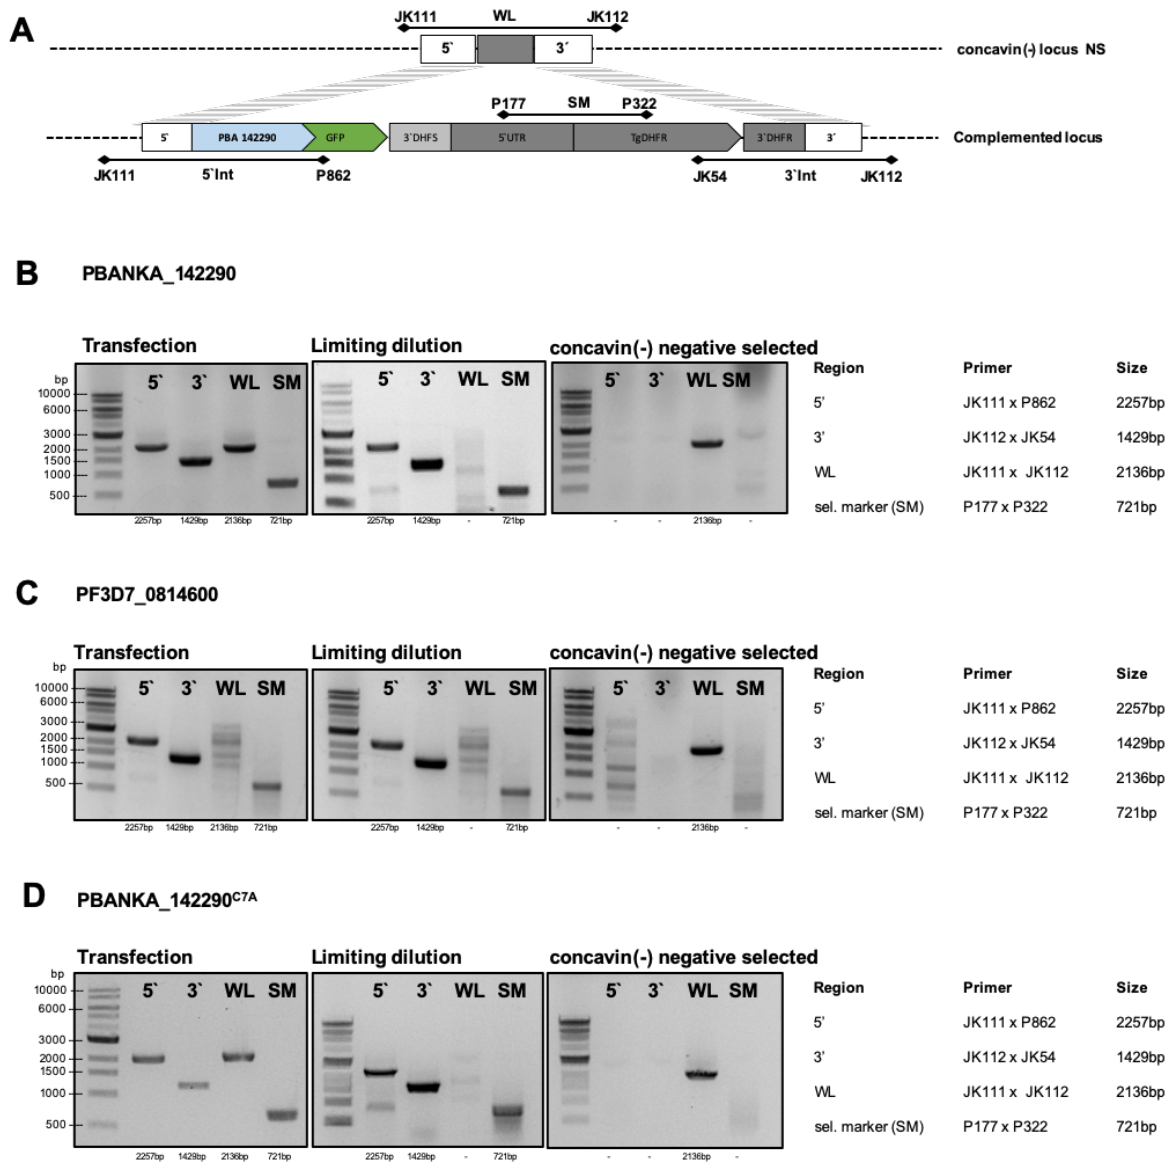

1125  
1126

1127 **Supplementary Figure S5 | Generation of *concavim(-)|P.berghei-gfp*, *concavim(-)|P.falciparum-gfp* and**  
 1128 ***concavim*<sup>C7A</sup> parasites via double homologous recombination into *concavim(-)* NS parasites. (A)** Cartoon  
 1129 showing the cloning strategy and primers used for genotyping. (B) Genotyping PCRs of the non-clonal  
 1130 *concavim(-)|P.berghei-gfp* parasite line directly after transfection and after limiting dilution. Agarose gel pictures  
 1131 show 5' integration, 3' integration as well as wildtype and selection marker as indicated in A. Expected amplicon  
 1132 sizes are indicated on the right. (C) Genotyping PCRs of the non-clonal *concavim(-)|P.falciparum-gfp* parasite line  
 1133 directly after transfection and after limiting dilution. Agarose gel pictures show 5' integration, 3' integration as well  
 1134 as wildtype and selection marker as indicated in A. Expected amplicon sizes are indicated on the right. (D)  
 1135 Genotyping PCRs of the non-clonal *concavim*<sup>C7A</sup> parasite line directly after transfection and after limiting dilution.  
 1136 Agarose gel pictures show 5' integration, 3' integration as well as wildtype and selection marker as indicated in A.  
 1137 Expected amplicon sizes are indicated on the right.

## Figure S6

### A Generation of PHIL1-GFP and PHIL1-GFP in PBANKA\_142290(-) NS

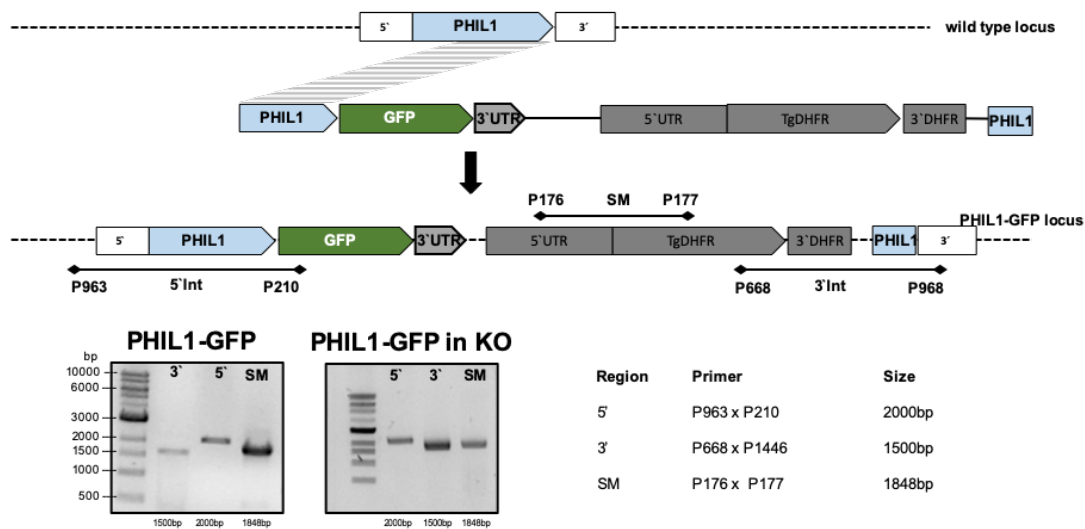

### B PHIL1-GFP

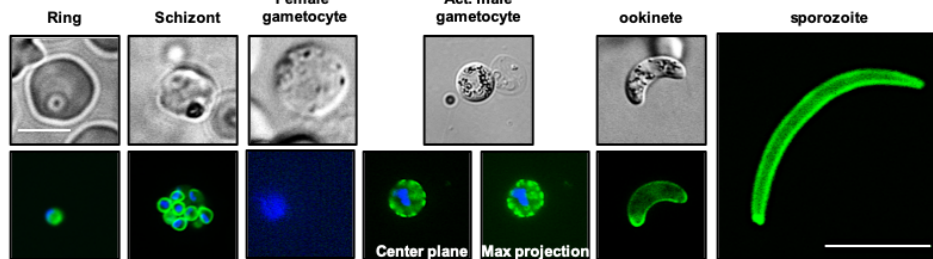

### C PHIL1-GFP in concavin(-)

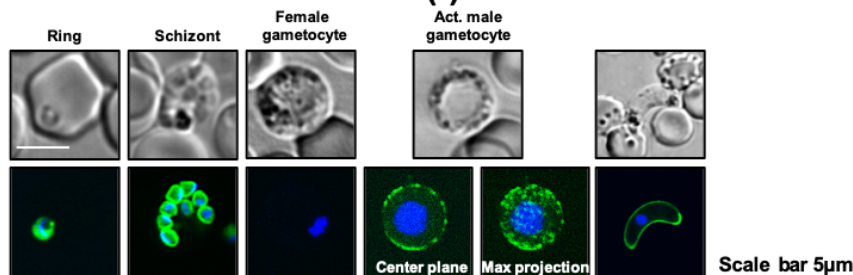

1138

1139

1140 **Supplementary Figure S6** | (A) Generation of *phil1-gfp* and *concavin(-)|phil1-gfp* parasites via single

1141 homologous recombination. The cartoon shows the cloning strategy and primers used for genotyping. Agarose gel

1142 pictures shows genotyping of the non-clonal parasites in the wild type as well as in the *concavin(-)* background.

1143 (B) Localization of PhiL1-GFP (green) in wild type parasites. Nuclei (blue) are stained with Hoechst. Scale bar: 5

1144 μm. (C) Localization of PhiL1-GFP (green) in *concavin(-)* parasites. Nuclei (blue) are stained with Hoechst. Scale

1145 bar: 5 μm.

1146

## Figure S7

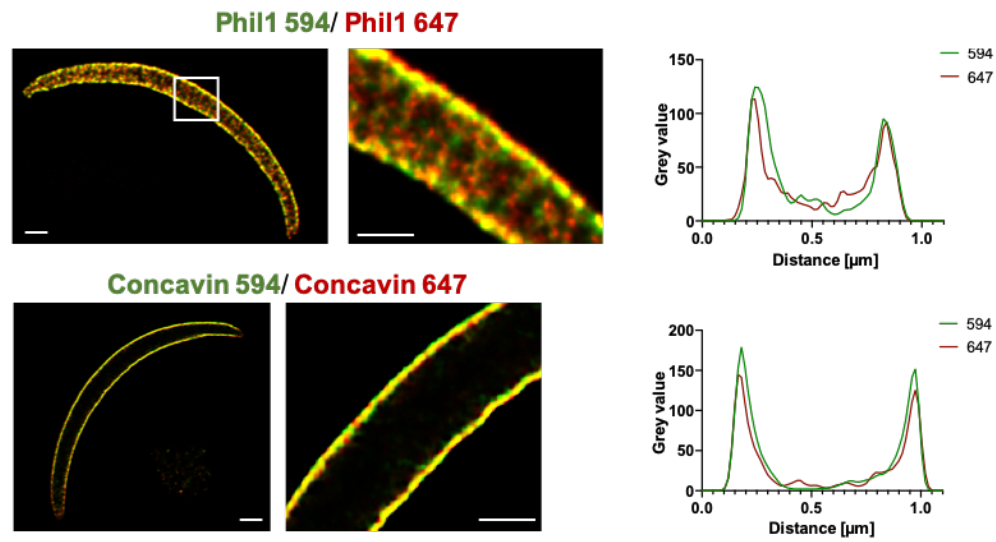

1147  
1148  
1149  
1150  
1151  
1152  
1153

**Supplementary Figure S7 | Control images used for STED.** Bleed through of signal in cells stained with atto-594 into the 647 channel resulted in overlays with almost no difference in distance between the 2 channels. Images were deconvolved using the Richardson-Lucy algorithm. The distance between the 2 signals was measured using the plot profile of the respective channels in Fiji (Figure 3C). Measurements and plot profiles taken at the center of the cell.

1154

## Figure S8

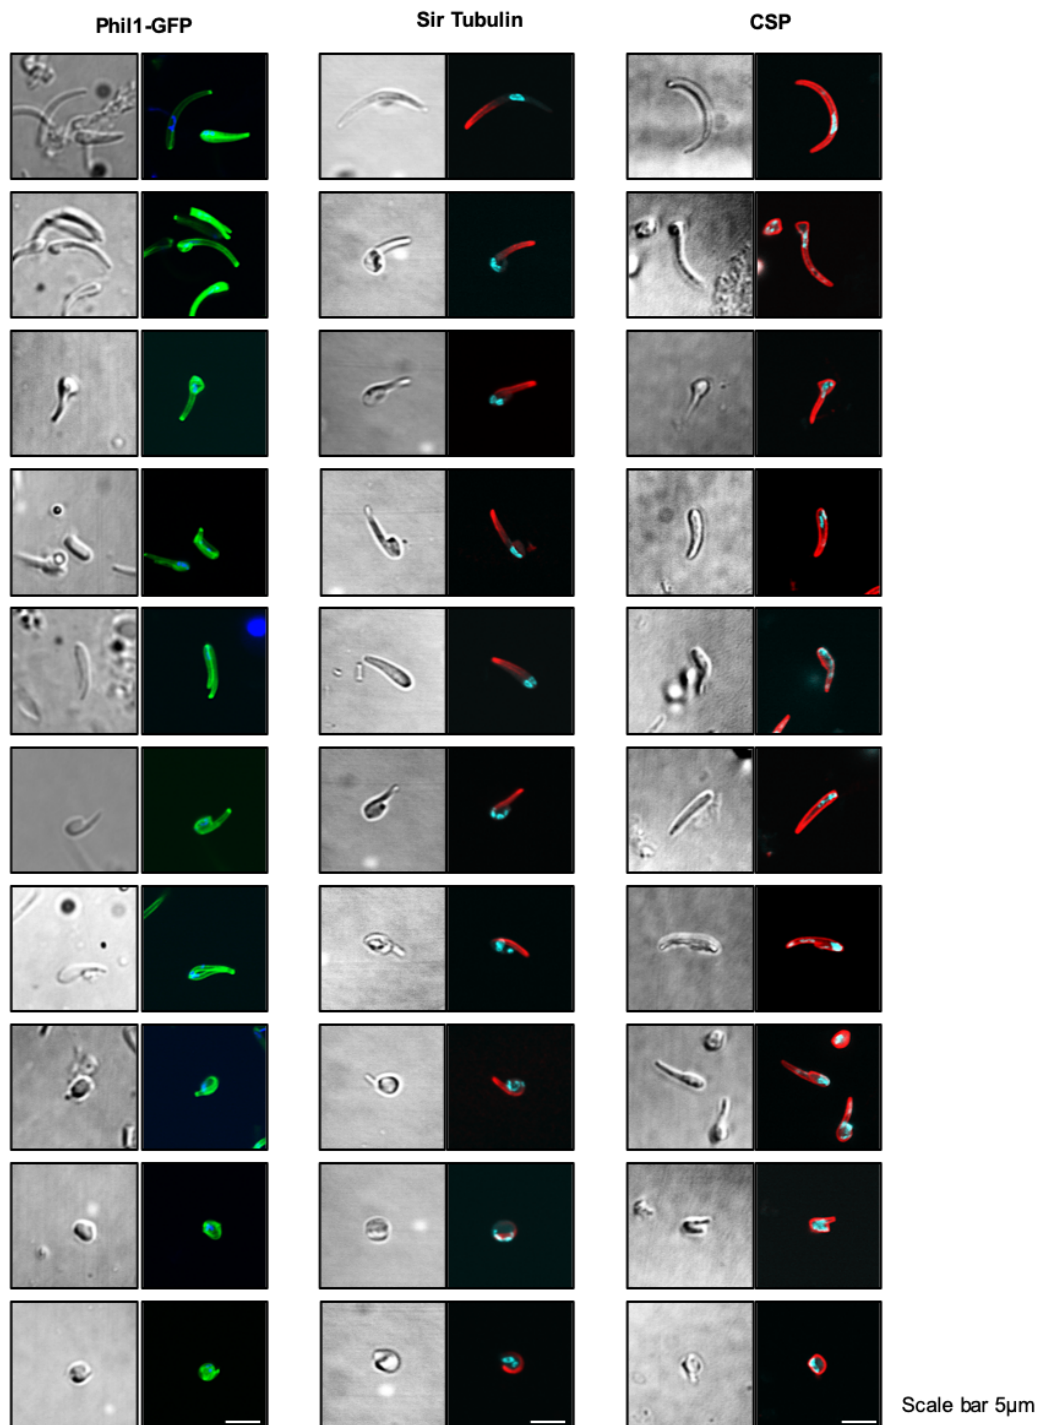

1155

1156

1157 **Supplementary Figure S8** | Image gallery of *concavin(-)* parasites expressing *phil1-gfp* (green) or stained with  
1158 SiR-tubulin or anti-CSP antibody (red). Scale bar:



1159

## Figure S9

**A**

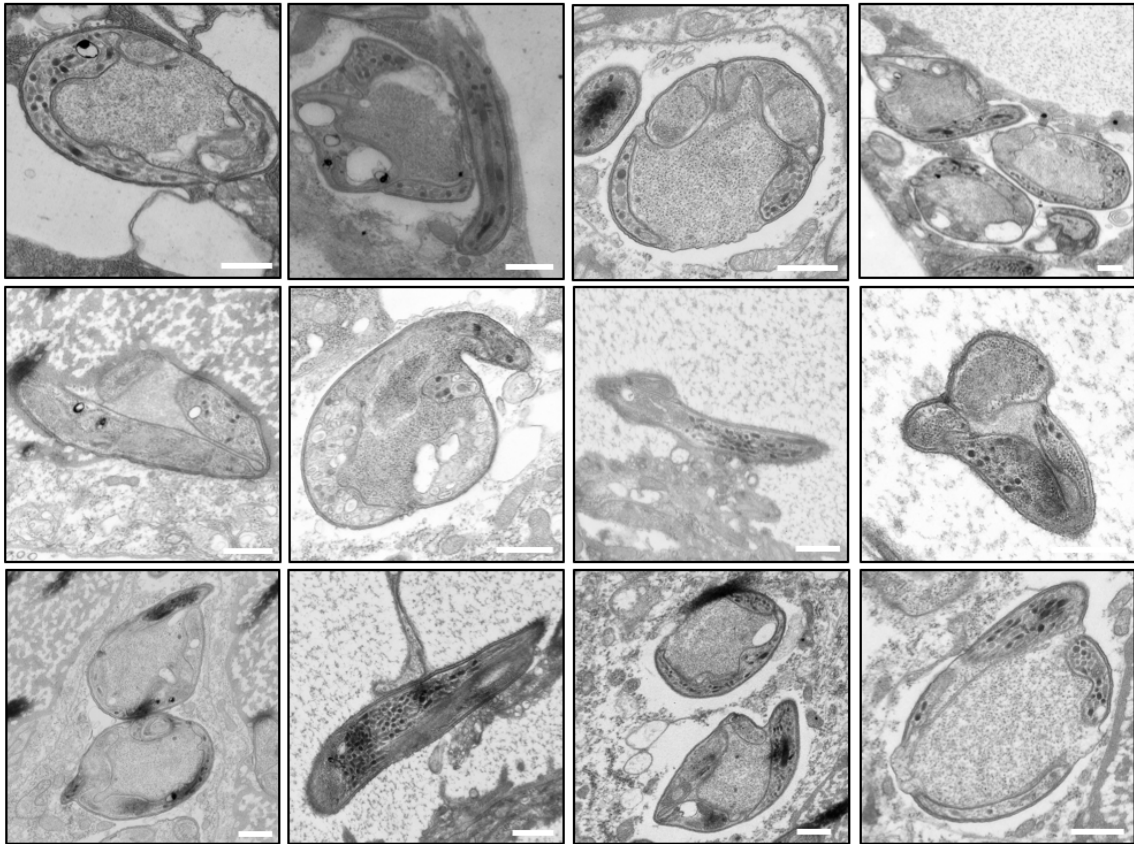

Scale bar 500nm

**B**

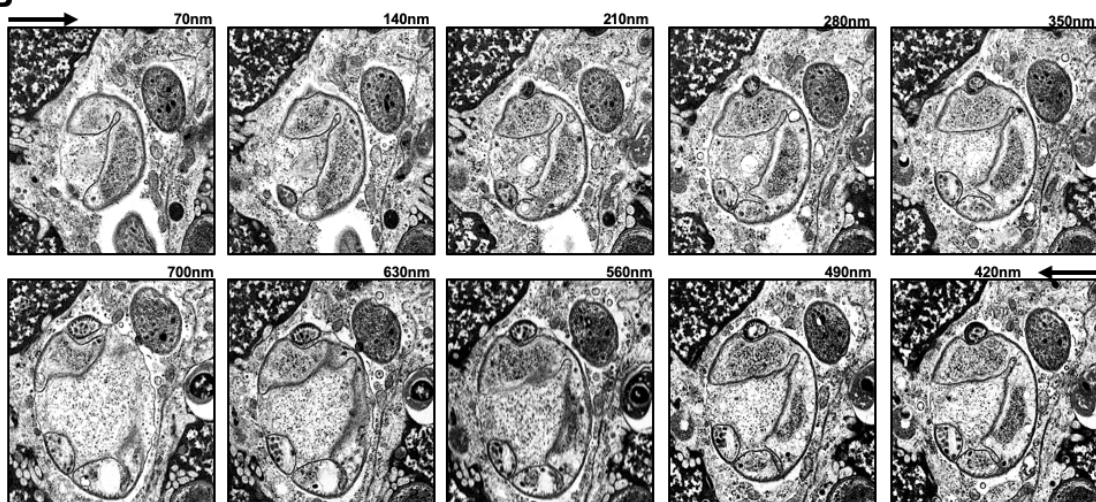

1160

1161

1162

1163

**Supplementary Figure S9** | (A) TEM image gallery of *concavin(-)* sporozoites showing clear invaginations of the IMC. (B) Exemplary SEM serial sections. Scale bar 500: nm



## Figure S10

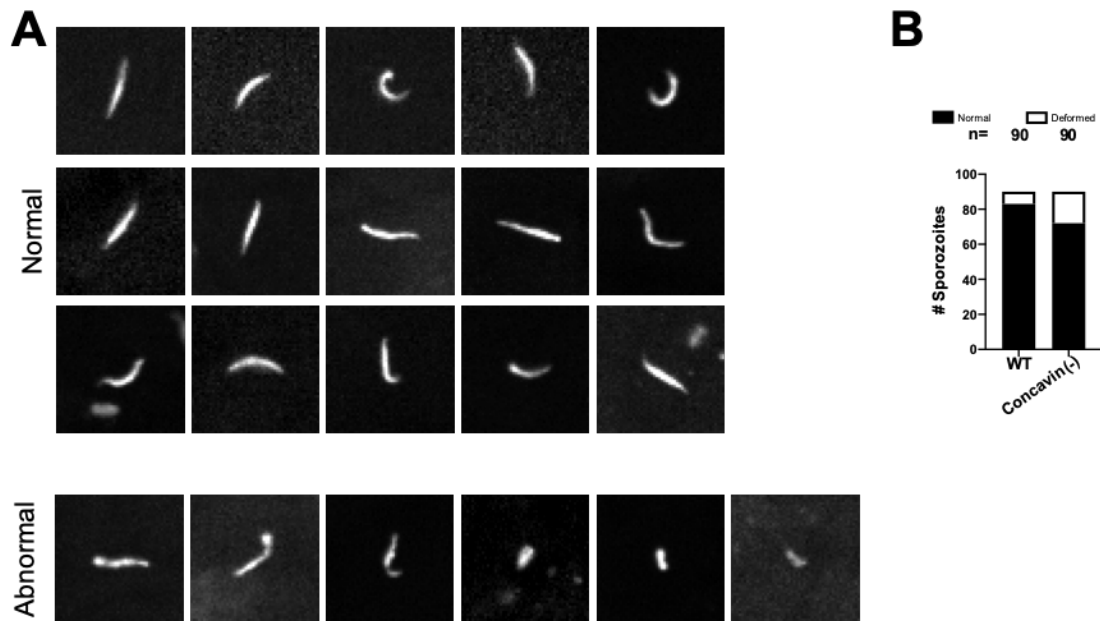

1164  
1165  
1166  
1167  
1168  
1169

**Supplementary Figure S10 | Examples from a representative bite site after transmission of *concavin(-)* parasites. (A) Morphology of normal and abnormal shaped *concavin(-)* sporozoites at the bite site. (B) Normally or abnormally shaped WT or *concavin(-)* sporozoites deposited in the skin. 90 sporozoites were observed for both parasite lines.**

1170  
1171

1172 **Supplementary Table 1** Primer used for genotyping

1173 **Supplementary Table 2** Raw data

1174 **Supplementary Movie 1** FRAP of gliding *concavin(-)*-GFP sporozoites

1175 **Supplementary Movie 2** FRAP of gliding Phil1-GFP sporozoites

1176 **Supplementary Movie 3** Sporozoite ejection on glass

1177 **Supplementary Movie 4** Time-lapse of moving wild type and *concavin(-)* sporozoites in the  
1178 skin

1179 **Supplementary Movie 5** Collection of migrating *concavin(-)* sporozoites either deforming or  
1180 disintegrating

1181
